# Supplementary material for: Modeling of axonal endoplasmic reticulum network by spastic paraplegia proteins
Source: eLife journal article supplement (doi:10.7554/elife.23882), 2017-07-25
Supplement: supp [file elife-23882-supp-v1.zip]

## Figure 1-figure supplement 1

### A. *Rtnl1*<sup>1</sup> mutant sequence

GCGTCTATNTATCGTTTCTTCTATTTCCCTCACTATATATGCTTTTTCCAAGGGAAATTCCGTTTCATTTCGATTTTCAGCTGGCCATGCG  
GTCGGCCCTCATATCTAGCCAAACCCTATATGTACATTTATATGAACATATA

>gnl|dmel|2L type=golden\_path\_region; loc=2L:1..23513712; ID=2L; dbxref=GB:AE014134,  
GB:AE014134, REFSEQ:NT\_033779; length=23513712; release=r6.12;

Query: 15 TTTCTTCTTA-TTTCCTCACTATATATGCTTTTT 48  
|||||  
Subject: 4993903 TTTCTTCTTAATTTCCCTCACTATATATGCTTTTT 4993937

>gnl|dmel|2L type=golden\_path\_region; loc=2L:1..23513712; ID=2L; dbxref=GB:AE014134,  
GB:AE014134, REFSEQ:NT\_033779; length=23513712; release=r6.12;

Query: 49 CCAAGGGAAATTCCGTTTCATTTCGATTTTCAGCTGGCCATGCGGTCGGCCCTCATATCTA 108  
|||||  
Subject: 4999086 CCAAGGGAAATTCCGTTTCATTTCGATTTTCAGCTGGCCATGCGGTCGGCCCTCATATCTA 4999145

Query: 109 GCCAAACCCTATATGTACATTTATATGAACATATA 143  
|||||  
Subject: 4999146 GCCAAACCCTATATGTACATTTATATGAACATATA 4999180

### B. *ReepA*<sup>541</sup> mutant sequence

TTCAATATCTTGATACTGAGGTGCTATTTTCTTGAACGCCTCTGTCGCAACATTCGGAAGTGC GGCGCATTCCTACGTGTAAACCATGATG  
AAATAACAACAAACCCATGTCAAAGATCCCAGATACTCGCCGCAATTCACAACGTGTTTGTACACAATACAGATGTGGGCCAAGTCACTT  
GTGGACTGCAACAGATTTTATGGCATCTGAAGTCAGCAACCA

>gnl|dmel|2R type=golden\_path\_region; loc=2R:1..25286936; ID=2R; dbxref=GB:AE013599,  
GB:AE013599, REFSEQ:NT\_033778; length=25286936; release=r6.12;

Query: 4 AATATCTTGATACTGAGGTGCTATTTTCTTGAACGCCTCTGTCGCAACATTCGGAAGTGC 63  
|||||  
Subject: 22926381 AATATCTTGATACTGAGGTGCTATTTTCTTGAACGCCTCTGTCGCAACATTCGGAAGTGC 22926440

Query: 64 GGCGCATTCCTACGTGTAAAC 84  
|||||  
Subject: 22926441 GGCGCATTCCTACGTGTAAAC 22926461

>gnl|dmel|2R type=golden\_path\_region; loc=2R:1..25286936; ID=2R; dbxref=GB:AE013599,  
GB:AE013599, REFSEQ:NT\_033778; length=25286936; release=r6.12;

Query: 100 AACAAACCCATGTCAAAGATCCCAGATACTCGCCGCAATTCACAACGTGTTTGTACACAA 159  
|||||  
Subject: 22928141 AACAAACCCATGTCAAAGATCCCAGATACTCGCCGCAATTCACAACGTGTTTGTACACAA 22928200

### C. *ReepB*<sup>48</sup> mutant sequence

TATTGAGACGTGGCGCTGTGCGCACACGTGGAGCCAATCTACTCACTCACCTGTGTGCGTTGGTAGAGCTTTCAGTTCGTTTCATGATGAA  
ATAACATAGGTGAGCTTTGCATTCTCACATATAAGAATCTTCTTTTAAATGCTTCAACTCCACATGTAGTGTGCTTCTCATCTGGTGC  
ATGCTGCCACGGAACAGAATGGTTCTACCATCATCTACA

>gnl|dmel|2R type=golden\_path\_region; loc=2R:1..25286936; ID=2R; dbxref=GB:AE013599,  
GB:AE013599, REFSEQ:NT\_033778; length=25286936; release=r6.12;

Query: 1 TATTGAGACGTGGCGCTGTGCGCACACGTGGAGCCAATCTACTCACTCACCTGTGTGCGT 60  
|||||  
Subject: 14171258 TATTGAGACGTGGCGCTGTGCGCACACGTGGAGCCAATCTACTCACTCACCTGTGTGCGT 14171317

Query: 61 TGGTAGAGCTTTCAGTTCGTTT 82  
|||||  
Subject: 14171318 TGGTAGAGCTTTCAGTTCGTTT 14171339

>gnl|dmel|2R type=golden\_path\_region; loc=2R:1..25286936; ID=2R; dbxref=GB:AE013599,  
GB:AE013599, REFSEQ:NT\_033778; length=25286936; release=r6.12;

Query: 99 AGGTGAGCTTTGCATTCTCACATATAAGAATCTTCTTTTAAATGCTTCAACTCCACATG 158  
|||||  
Subject: 14172521 AGGTGAGCTTTGCATTCTCACATATAAGAATCTTCTTTTAAATGCTTCAACTCCACATG 14172580
