# Supplementary material for: Modeling of axonal endoplasmic reticulum network by spastic paraplegia proteins
Source: eLife journal article supplement (doi:10.7554/elife.23882), 2017-07-25

*RtnI1<sup>-</sup> ReepA<sup>-</sup> ReepB<sup>-</sup>*

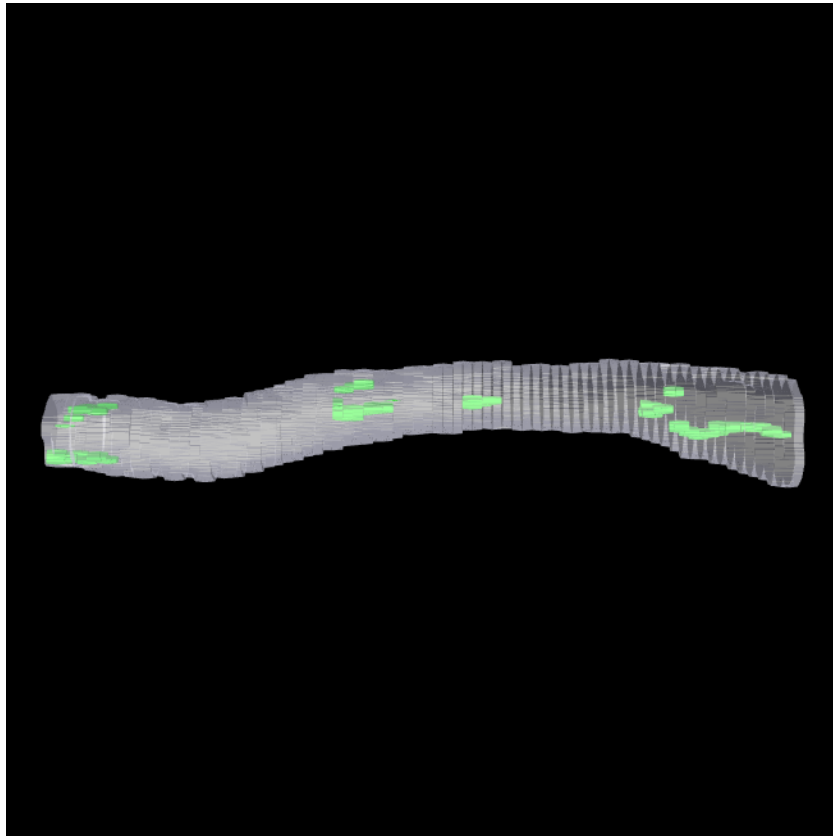

Supplement: supp [file elife-23882-supp-v1.zip]
