# Supplementary material for: Modeling of axonal endoplasmic reticulum network by spastic paraplegia proteins
Source: eLife. 2017 Jul 25;6:e23882. doi: 10.7554/eLife.23882 (PMC5576921; doi:10.7554/eLife.23882)
Supplement: Supplementary file 1. — BLASTP searches of Refseq proteins, using different Drosophila melanogaster Reep protein sequences as queries, show that CG42678 (ReepA) and CG8331 (ReepB) are diverging more slowly than CG4960, CG5539, CG11697, and CG30177, as measured by the change in E value across phylogenetic distance. Each sheet shows the hundred most similar sequences found in each BLASTP search. Hits in D. melanogaster, including the most closely related paralogs, are highlighted in yellow. DOI: http://dx.doi.org/10.7554/eLife.23882.024 [file elife-23882-supp1.xlsx]

## Sheet: CG42678_PJ
Blastp results for CG42678-PJ
	Sequences producing significant alignments:
	Select:AllNone Selected:0
	AlignmentsDownloadGenPeptGraphicsDistance tree of resultsMultiple alignmentShow/hide columns of the table presenting sequences producing significant alignments
	Sequences producing significant alignments:
	Select for downloading or viewing reports	Description	Max score	Total score	Query cover	E value	Ident	Accession
	Select seq ref|NP_001188989.1|	REEP1 homolog, isoform J [Drosophila melanogaster]	1183	1183	1	0	1	NP_001188989.1
	Select seq ref|NP_001188987.1|	REEP1 homolog, isoform H [Drosophila melanogaster]	1174	1174	1	0	0.99	NP_001188987.1
	Select seq ref|NP_001188988.1|	REEP1 homolog, isoform I [Drosophila melanogaster]	1150	1150	0.98	0	0.99	NP_001188988.1
	Select seq ref|NP_001188990.2|	REEP1 homolog, isoform P [Drosophila melanogaster]	1102	1102	0.93	0	0.99	NP_001188990.2
	Select seq ref|XP_016029167.1|	uncharacterized protein Dsimw501_GD11726, isoform E [Drosophila simulans]	1085	1085	1	0	0.96	XP_016029167.1
	Select seq ref|XP_016029173.1|	uncharacterized protein Dsimw501_GD11726, isoform K [Drosophila simulans]	1078	1078	1	0	0.95	XP_016029173.1
	Select seq ref|NP_001286749.1|	REEP1 homolog, isoform Q [Drosophila melanogaster]	1076	1076	0.91	0	0.99	NP_001286749.1
	Select seq ref|XP_016029164.1|	uncharacterized protein Dsimw501_GD11726, isoform B [Drosophila simulans]	1057	1057	0.98	0	0.96	XP_016029164.1
	Select seq ref|XP_016029176.1|	uncharacterized protein Dsimw501_GD11726, isoform N [Drosophila simulans]	1051	1051	0.98	0	0.95	XP_016029176.1
	Select seq ref|XP_015012640.1|	uncharacterized protein Dere_GG22816, isoform H [Drosophila erecta]	1050	1050	1	0	0.91	XP_015012640.1
	Select seq ref|XP_015012635.1|	uncharacterized protein Dere_GG22816, isoform C [Drosophila erecta]	1043	1043	1	0	0.91	XP_015012635.1
	Select seq ref|XP_015051540.1|	uncharacterized protein Dyak_GE14249, isoform F [Drosophila yakuba]	1040	1040	1	0	0.9	XP_015051540.1
	Select seq ref|XP_015051541.1|	uncharacterized protein Dyak_GE14249, isoform G [Drosophila yakuba]	1033	1033	1	0	0.89	XP_015051541.1
	Select seq ref|XP_015012638.1|	uncharacterized protein Dere_GG22816, isoform F [Drosophila erecta]	1022	1022	0.98	0	0.91	XP_015012638.1
	Select seq ref|XP_015012637.1|	uncharacterized protein Dere_GG22816, isoform E [Drosophila erecta]	1016	1016	0.98	0	0.91	XP_015012637.1
	Select seq ref|XP_015051537.1|	uncharacterized protein Dyak_GE14249, isoform C [Drosophila yakuba]	1013	1013	0.98	0	0.89	XP_015051537.1
	Select seq ref|XP_016029171.1|	uncharacterized protein Dsimw501_GD11726, isoform I [Drosophila simulans]	1008	1008	0.93	0	0.95	XP_016029171.1
	Select seq ref|XP_015051539.1|	uncharacterized protein Dyak_GE14249, isoform E [Drosophila yakuba]	1006	1006	0.98	0	0.89	XP_015051539.1
	Select seq ref|XP_016029170.1|	uncharacterized protein Dsimw501_GD11726, isoform H [Drosophila simulans]	988	988	0.91	0	0.95	XP_016029170.1
	Select seq ref|XP_016029166.1|	uncharacterized protein Dsimw501_GD11726, isoform D [Drosophila simulans]	981	981	0.91	0	0.95	XP_016029166.1
	Select seq ref|XP_017132065.1|	PREDICTED: uncharacterized protein LOC108149172 isoform X5 [Drosophila elegans]	971	971	1	0	0.85	XP_017132065.1
	Select seq ref|XP_017132066.1|	PREDICTED: uncharacterized protein LOC108149172 isoform X6 [Drosophila elegans]	964	964	1	0	0.84	XP_017132066.1
	Select seq ref|XP_015051538.1|	uncharacterized protein Dyak_GE14249, isoform D [Drosophila yakuba]	947	947	0.91	0	0.89	XP_015051538.1
	Select seq ref|XP_017132060.1|	PREDICTED: uncharacterized protein LOC108149172 isoform X1 [Drosophila elegans]	945	945	0.98	0	0.84	XP_017132060.1
	Select seq ref|XP_017132062.1|	PREDICTED: uncharacterized protein LOC108149172 isoform X2 [Drosophila elegans]	938	938	0.98	0	0.84	XP_017132062.1
	Select seq ref|XP_016980826.1|	PREDICTED: uncharacterized protein LOC108045881 isoform X5 [Drosophila rhopaloa]	934	934	1	0	0.85	XP_016980826.1
	Select seq ref|XP_016980827.1|	PREDICTED: uncharacterized protein LOC108045881 isoform X6 [Drosophila rhopaloa]	928	928	1	0	0.85	XP_016980827.1
	Select seq ref|XP_017078774.1|	PREDICTED: uncharacterized protein LOC108112911 isoform X4 [Drosophila eugracilis]	918	918	1	0	0.83	XP_017078774.1
	Select seq ref|XP_017078775.1|	PREDICTED: uncharacterized protein LOC108112911 isoform X5 [Drosophila eugracilis]	911	911	1	0	0.83	XP_017078775.1
	Select seq ref|XP_016980822.1|	PREDICTED: uncharacterized protein LOC108045881 isoform X1 [Drosophila rhopaloa]	910	910	0.98	0	0.84	XP_016980822.1
	Select seq ref|XP_016929781.1|	PREDICTED: uncharacterized protein LOC108009721 isoform X5 [Drosophila suzukii]	910	910	1	0	0.83	XP_016929781.1
	Select seq ref|XP_016980823.1|	PREDICTED: uncharacterized protein LOC108045881 isoform X2 [Drosophila rhopaloa]	903	903	0.98	0	0.84	XP_016980823.1
	Select seq ref|XP_016929783.1|	PREDICTED: uncharacterized protein LOC108009721 isoform X6 [Drosophila suzukii]	903	903	1	0	0.83	XP_016929783.1
	Select seq ref|XP_017132067.1|	PREDICTED: uncharacterized protein LOC108149172 isoform X7 [Drosophila elegans]	902	902	0.93	0	0.84	XP_017132067.1
	Select seq ref|XP_017053987.1|	PREDICTED: uncharacterized protein LOC108096691 isoform X5 [Drosophila ficusphila]	899	899	1	0	0.84	XP_017053987.1
	Select seq ref|XP_016998760.1|	PREDICTED: uncharacterized protein LOC108058513 isoform X5 [Drosophila takahashii]	896	896	1	0	0.83	XP_016998760.1
	Select seq ref|XP_016947389.1|	PREDICTED: uncharacterized protein LOC108022782 isoform X5 [Drosophila biarmipes]	895	895	1	0	0.83	XP_016947389.1
	Select seq ref|XP_017053988.1|	PREDICTED: uncharacterized protein LOC108096691 isoform X6 [Drosophila ficusphila]	892	892	1	0	0.83	XP_017053988.1
	Select seq ref|XP_017078771.1|	PREDICTED: uncharacterized protein LOC108112911 isoform X1 [Drosophila eugracilis]	890	890	0.99	0	0.82	XP_017078771.1
	Select seq ref|XP_016998762.1|	PREDICTED: uncharacterized protein LOC108058513 isoform X6 [Drosophila takahashii]	889	889	1	0	0.83	XP_016998762.1
	Select seq ref|XP_016947390.1|	PREDICTED: uncharacterized protein LOC108022782 isoform X6 [Drosophila biarmipes]	888	888	1	0	0.83	XP_016947390.1
	Select seq ref|XP_017132063.1|	PREDICTED: uncharacterized protein LOC108149172 isoform X3 [Drosophila elegans]	884	884	0.91	0	0.84	XP_017132063.1
	Select seq ref|XP_016929776.1|	PREDICTED: uncharacterized protein LOC108009721 isoform X1 [Drosophila suzukii]	884	884	0.98	0	0.83	XP_016929776.1
	Select seq ref|XP_017078772.1|	PREDICTED: uncharacterized protein LOC108112911 isoform X2 [Drosophila eugracilis]	884	884	0.99	0	0.81	XP_017078772.1
	Select seq ref|XP_017132064.1|	PREDICTED: uncharacterized protein LOC108149172 isoform X4 [Drosophila elegans]	878	878	0.91	0	0.84	XP_017132064.1
	Select seq ref|XP_016929777.1|	PREDICTED: uncharacterized protein LOC108009721 isoform X2 [Drosophila suzukii]	877	877	0.98	0	0.82	XP_016929777.1
	Select seq ref|XP_017053983.1|	PREDICTED: uncharacterized protein LOC108096691 isoform X1 [Drosophila ficusphila]	873	873	0.98	0	0.83	XP_017053983.1
	Select seq ref|XP_016998756.1|	PREDICTED: uncharacterized protein LOC108058513 isoform X1 [Drosophila takahashii]	870	870	0.98	0	0.83	XP_016998756.1
	Select seq ref|XP_016947384.1|	PREDICTED: uncharacterized protein LOC108022782 isoform X1 [Drosophila biarmipes]	868	868	0.98	0	0.82	XP_016947384.1
	Select seq ref|XP_017053984.1|	PREDICTED: uncharacterized protein LOC108096691 isoform X2 [Drosophila ficusphila]	867	867	0.98	0	0.83	XP_017053984.1
	Select seq ref|XP_016980828.1|	PREDICTED: uncharacterized protein LOC108045881 isoform X7 [Drosophila rhopaloa]	866	866	0.93	0	0.84	XP_016980828.1
	Select seq ref|XP_016998757.1|	PREDICTED: uncharacterized protein LOC108058513 isoform X2 [Drosophila takahashii]	863	863	0.98	0	0.83	XP_016998757.1
	Select seq ref|XP_016947385.1|	PREDICTED: uncharacterized protein LOC108022782 isoform X2 [Drosophila biarmipes]	861	861	0.98	0	0.82	XP_016947385.1
	Select seq ref|XP_016980824.1|	PREDICTED: uncharacterized protein LOC108045881 isoform X3 [Drosophila rhopaloa]	848	848	0.91	0	0.84	XP_016980824.1
	Select seq ref|XP_016929784.1|	PREDICTED: uncharacterized protein LOC108009721 isoform X7 [Drosophila suzukii]	844	844	0.93	0	0.83	XP_016929784.1
	Select seq ref|XP_016980825.1|	PREDICTED: uncharacterized protein LOC108045881 isoform X4 [Drosophila rhopaloa]	842	842	0.91	0	0.84	XP_016980825.1
	Select seq ref|NP_611737.2|	REEP1 homolog, isoform K [Drosophila melanogaster]	831	831	0.71	0	0.99	NP_611737.2
	Select seq ref|XP_016998763.1|	PREDICTED: uncharacterized protein LOC108058513 isoform X7 [Drosophila takahashii]	830	830	0.93	0	0.83	XP_016998763.1
	Select seq ref|XP_017053989.1|	PREDICTED: uncharacterized protein LOC108096691 isoform X7 [Drosophila ficusphila]	829	829	0.93	0	0.83	XP_017053989.1
	Select seq ref|XP_017078773.1|	PREDICTED: uncharacterized protein LOC108112911 isoform X3 [Drosophila eugracilis]	828	828	0.93	0	0.81	XP_017078773.1
	Select seq ref|XP_016947391.1|	PREDICTED: uncharacterized protein LOC108022782 isoform X7 [Drosophila biarmipes]	825	825	0.93	0	0.82	XP_016947391.1
	Select seq ref|XP_016929778.1|	PREDICTED: uncharacterized protein LOC108009721 isoform X3 [Drosophila suzukii]	824	824	0.91	0	0.82	XP_016929778.1
	Select seq ref|XP_017090901.1|	PREDICTED: uncharacterized protein LOC108121372 isoform X3 [Drosophila bipectinata]	818	818	1	0	0.76	XP_017090901.1
	Select seq ref|XP_016929779.1|	PREDICTED: uncharacterized protein LOC108009721 isoform X4 [Drosophila suzukii]	817	817	0.91	0	0.82	XP_016929779.1
	Select seq ref|XP_016998758.1|	PREDICTED: uncharacterized protein LOC108058513 isoform X3 [Drosophila takahashii]	811	811	0.91	0	0.82	XP_016998758.1
	Select seq ref|XP_017053985.1|	PREDICTED: uncharacterized protein LOC108096691 isoform X3 [Drosophila ficusphila]	811	811	0.91	0	0.83	XP_017053985.1
	Select seq ref|XP_016947387.1|	PREDICTED: uncharacterized protein LOC108022782 isoform X3 [Drosophila biarmipes]	805	805	0.91	0	0.82	XP_016947387.1
	Select seq ref|XP_016998759.1|	PREDICTED: uncharacterized protein LOC108058513 isoform X4 [Drosophila takahashii]	805	805	0.91	0	0.82	XP_016998759.1
	Select seq ref|XP_017053986.1|	PREDICTED: uncharacterized protein LOC108096691 isoform X4 [Drosophila ficusphila]	804	804	0.91	0	0.82	XP_017053986.1
	Select seq ref|XP_016947388.1|	PREDICTED: uncharacterized protein LOC108022782 isoform X4 [Drosophila biarmipes]	798	798	0.91	0	0.82	XP_016947388.1
	Select seq ref|XP_017090898.1|	PREDICTED: uncharacterized protein LOC108121372 isoform X1 [Drosophila bipectinata]	795	795	0.98	0	0.75	XP_017090898.1
	Select seq ref|XP_017038445.1|	PREDICTED: histone-lysine N-methyltransferase SETD1B isoform X5 [Drosophila kikkawai]	791	791	1	0	0.76	XP_017038445.1
	Select seq ref|XP_017038447.1|	PREDICTED: histone-lysine N-methyltransferase SETD1B isoform X6 [Drosophila kikkawai]	789	789	1	0	0.76	XP_017038447.1
	Select seq ref|XP_014763800.1|	LOW QUALITY PROTEIN: uncharacterized protein Dana_GF13556 [Drosophila ananassae]	787	787	0.98	0	0.74	XP_014763800.1
	Select seq ref|XP_017038441.1|	PREDICTED: uncharacterized protein LOC108086116 isoform X1 [Drosophila kikkawai]	767	767	0.99	0	0.75	XP_017038441.1
	Select seq ref|XP_017038442.1|	PREDICTED: uncharacterized protein LOC108086116 isoform X2 [Drosophila kikkawai]	766	766	0.99	0	0.75	XP_017038442.1
	Select seq ref|XP_017090902.1|	PREDICTED: uncharacterized protein LOC108121372 isoform X4 [Drosophila bipectinata]	757	757	0.93	0	0.75	XP_017090902.1
	Select seq ref|XP_002040000.1|	GM15974 [Drosophila sechellia]	751	751	0.75	0	0.92	XP_002040000.1
	Select seq ref|XP_017038448.1|	PREDICTED: histone-lysine N-methyltransferase SETD1B isoform X7 [Drosophila kikkawai]	736	736	0.93	0	0.76	XP_017038448.1
	Select seq ref|XP_017090900.1|	PREDICTED: uncharacterized protein LOC108121372 isoform X2 [Drosophila bipectinata]	733	733	0.91	0	0.75	XP_017090900.1
	Select seq ref|XP_017038443.1|	PREDICTED: uncharacterized protein LOC108086116 isoform X3 [Drosophila kikkawai]	714	714	0.93	0	0.74	XP_017038443.1
	Select seq ref|XP_017038444.1|	PREDICTED: uncharacterized protein LOC108086116 isoform X4 [Drosophila kikkawai]	713	713	0.93	0	0.74	XP_017038444.1
	Select seq ref|XP_004444544.2|	uncharacterized protein Dpse_GA30269, isoform J [Drosophila pseudoobscura pseudoobscura]	711	711	1	0	0.7	XP_004444544.2
	Select seq ref|XP_004444541.1|	uncharacterized protein Dpse_GA30269, isoform A [Drosophila pseudoobscura pseudoobscura]	704	704	1	0	0.69	XP_004444541.1
	Select seq ref|XP_015040719.1|	uncharacterized protein Dpse_GA30269, isoform M [Drosophila pseudoobscura pseudoobscura]	689	689	0.98	0	0.69	XP_015040719.1
	Select seq ref|XP_004444545.1|	uncharacterized protein Dpse_GA30269, isoform G [Drosophila pseudoobscura pseudoobscura]	683	683	0.98	0	0.69	XP_004444545.1
	Select seq ref|XP_017146559.1|	PREDICTED: uncharacterized protein LOC108158605 isoform X4 [Drosophila miranda]	671	671	0.93	0	0.7	XP_017146559.1
	Select seq ref|XP_017146561.1|	PREDICTED: uncharacterized protein LOC108158605 isoform X5 [Drosophila miranda]	664	664	0.93	0	0.7	XP_017146561.1
	Select seq ref|XP_017146556.1|	PREDICTED: uncharacterized protein LOC108158605 isoform X1 [Drosophila miranda]	649	649	0.91	0	0.7	XP_017146556.1
	Select seq ref|XP_015040716.1|	uncharacterized protein Dpse_GA30269, isoform H [Drosophila pseudoobscura pseudoobscura]	646	646	0.91	0	0.7	XP_015040716.1
	Select seq ref|XP_017146557.1|	PREDICTED: uncharacterized protein LOC108158605 isoform X2 [Drosophila miranda]	642	642	0.91	0	0.7	XP_017146557.1
	Select seq ref|XP_015034454.1|	uncharacterized protein Dwil_GK19544, isoform D [Drosophila willistoni]	637	637	1	0	0.62	XP_015034454.1
	Select seq ref|XP_015034452.1|	uncharacterized protein Dwil_GK19544, isoform B [Drosophila willistoni]	613	613	0.98	0	0.61	XP_015034452.1
	Select seq ref|XP_017146558.1|	PREDICTED: uncharacterized protein LOC108158605 isoform X3 [Drosophila miranda]	610	610	0.91	0	0.67	XP_017146558.1
	Select seq ref|XP_015040717.1|	uncharacterized protein Dpse_GA30269, isoform I [Drosophila pseudoobscura pseudoobscura]	608	608	0.82	0	0.69	XP_015040717.1
	Select seq ref|XP_015020093.1|	uncharacterized protein Dmoj_GI21304, isoform C [Drosophila mojavensis]	603	603	1	0	0.58	XP_015020093.1
	Select seq ref|XP_017146562.1|	PREDICTED: uncharacterized protein LOC108158605 isoform X6 [Drosophila miranda]	600	600	0.87	0	0.69	XP_017146562.1
	Select seq ref|XP_017053991.1|	PREDICTED: pollen-specific leucine-rich repeat extensin-like protein 1 isoform X8 [Drosophila ficusphila]	599	599	0.78	0	0.76	XP_017053991.1
	Select seq ref|XP_015029760.1|	uncharacterized protein Dvir_GJ21570, isoform B [Drosophila virilis]	586	586	1	0	0.59	XP_015029760.1
	Select seq ref|NP_001286751.1|	REEP1 homolog, isoform S [Drosophila melanogaster]	580	580	0.47	0	1	NP_001286751.1

## Sheet: CG42678_PI
Blastp results for CG42678-PI
	Sequences producing significant alignments:
	Select:AllNone Selected:0
	AlignmentsDownloadGenPeptGraphicsDistance tree of resultsMultiple alignmentShow/hide columns of the table presenting sequences producing significant alignments
	Sequences producing significant alignments:
	Select for downloading or viewing reports	Description	Max score	Total score	Query cover	E value	Ident	Accession
	Select seq ref|NP_001188988.1|	REEP1 homolog, isoform I [Drosophila melanogaster]	1482	1482	1	0	1	NP_001188988.1
	Select seq ref|NP_001286749.1|	REEP1 homolog, isoform Q [Drosophila melanogaster]	1410	1410	0.94	0	1	NP_001286749.1
	Select seq ref|XP_016029176.1|	uncharacterized protein Dsimw501_GD11726, isoform N [Drosophila simulans]	1356	1356	1	0	0.96	XP_016029176.1
	Select seq ref|XP_016029164.1|	uncharacterized protein Dsimw501_GD11726, isoform B [Drosophila simulans]	1352	1352	1	0	0.96	XP_016029164.1
	Select seq ref|XP_015051539.1|	uncharacterized protein Dyak_GE14249, isoform E [Drosophila yakuba]	1313	1313	1	0	0.91	XP_015051539.1
	Select seq ref|XP_015051537.1|	uncharacterized protein Dyak_GE14249, isoform C [Drosophila yakuba]	1309	1309	1	0	0.91	XP_015051537.1
	Select seq ref|XP_015012637.1|	uncharacterized protein Dere_GG22816, isoform E [Drosophila erecta]	1307	1307	1	0	0.91	XP_015012637.1
	Select seq ref|XP_015012638.1|	uncharacterized protein Dere_GG22816, isoform F [Drosophila erecta]	1303	1303	1	0	0.91	XP_015012638.1
	Select seq ref|XP_016029166.1|	uncharacterized protein Dsimw501_GD11726, isoform D [Drosophila simulans]	1285	1285	0.94	0	0.96	XP_016029166.1
	Select seq ref|XP_016029170.1|	uncharacterized protein Dsimw501_GD11726, isoform H [Drosophila simulans]	1281	1281	0.94	0	0.95	XP_016029170.1
	Select seq ref|XP_015051538.1|	uncharacterized protein Dyak_GE14249, isoform D [Drosophila yakuba]	1244	1244	0.94	0	0.9	XP_015051538.1
	Select seq ref|XP_017132062.1|	PREDICTED: uncharacterized protein LOC108149172 isoform X2 [Drosophila elegans]	1231	1231	1	0	0.85	XP_017132062.1
	Select seq ref|XP_017132060.1|	PREDICTED: uncharacterized protein LOC108149172 isoform X1 [Drosophila elegans]	1227	1227	1	0	0.85	XP_017132060.1
	Select seq ref|XP_016980823.1|	PREDICTED: uncharacterized protein LOC108045881 isoform X2 [Drosophila rhopaloa]	1202	1202	1	0	0.86	XP_016980823.1
	Select seq ref|XP_016980822.1|	PREDICTED: uncharacterized protein LOC108045881 isoform X1 [Drosophila rhopaloa]	1197	1197	1	0	0.85	XP_016980822.1
	Select seq ref|XP_017078772.1|	PREDICTED: uncharacterized protein LOC108112911 isoform X2 [Drosophila eugracilis]	1181	1181	1	0	0.85	XP_017078772.1
	Select seq ref|XP_017078771.1|	PREDICTED: uncharacterized protein LOC108112911 isoform X1 [Drosophila eugracilis]	1175	1175	1	0	0.84	XP_017078771.1
	Select seq ref|XP_017132064.1|	PREDICTED: uncharacterized protein LOC108149172 isoform X4 [Drosophila elegans]	1170	1170	0.94	0	0.85	XP_017132064.1
	Select seq ref|XP_017132063.1|	PREDICTED: uncharacterized protein LOC108149172 isoform X3 [Drosophila elegans]	1166	1166	0.94	0	0.85	XP_017132063.1
	Select seq ref|XP_016929777.1|	PREDICTED: uncharacterized protein LOC108009721 isoform X2 [Drosophila suzukii]	1162	1162	1	0	0.85	XP_016929777.1
	Select seq ref|XP_016929776.1|	PREDICTED: uncharacterized protein LOC108009721 isoform X1 [Drosophila suzukii]	1157	1157	1	0	0.84	XP_016929776.1
	Select seq ref|NP_001188987.1|	REEP1 homolog, isoform H [Drosophila melanogaster]	1154	1154	0.77	0	1	NP_001188987.1
	Select seq ref|XP_017053984.1|	PREDICTED: uncharacterized protein LOC108096691 isoform X2 [Drosophila ficusphila]	1151	1151	1	0	0.84	XP_017053984.1
	Select seq ref|NP_001188989.1|	REEP1 homolog, isoform J [Drosophila melanogaster]	1150	1150	0.77	0	0.99	NP_001188989.1
	Select seq ref|XP_016947385.1|	PREDICTED: uncharacterized protein LOC108022782 isoform X2 [Drosophila biarmipes]	1147	1147	1	0	0.84	XP_016947385.1
	Select seq ref|XP_017053983.1|	PREDICTED: uncharacterized protein LOC108096691 isoform X1 [Drosophila ficusphila]	1146	1146	1	0	0.84	XP_017053983.1
	Select seq ref|XP_016947384.1|	PREDICTED: uncharacterized protein LOC108022782 isoform X1 [Drosophila biarmipes]	1143	1143	1	0	0.84	XP_016947384.1
	Select seq ref|XP_016998757.1|	PREDICTED: uncharacterized protein LOC108058513 isoform X2 [Drosophila takahashii]	1143	1143	1	0	0.84	XP_016998757.1
	Select seq ref|XP_016980825.1|	PREDICTED: uncharacterized protein LOC108045881 isoform X4 [Drosophila rhopaloa]	1140	1140	0.94	0	0.85	XP_016980825.1
	Select seq ref|XP_016998756.1|	PREDICTED: uncharacterized protein LOC108058513 isoform X1 [Drosophila takahashii]	1138	1138	1	0	0.84	XP_016998756.1
	Select seq ref|XP_016980824.1|	PREDICTED: uncharacterized protein LOC108045881 isoform X3 [Drosophila rhopaloa]	1136	1136	0.94	0	0.85	XP_016980824.1
	Select seq ref|XP_017078773.1|	PREDICTED: uncharacterized protein LOC108112911 isoform X3 [Drosophila eugracilis]	1112	1112	0.94	0	0.84	XP_017078773.1
	Select seq ref|XP_016929779.1|	PREDICTED: uncharacterized protein LOC108009721 isoform X4 [Drosophila suzukii]	1103	1103	0.94	0	0.85	XP_016929779.1
	Select seq ref|XP_016929778.1|	PREDICTED: uncharacterized protein LOC108009721 isoform X3 [Drosophila suzukii]	1098	1098	0.94	0	0.84	XP_016929778.1
	Select seq ref|XP_017053986.1|	PREDICTED: uncharacterized protein LOC108096691 isoform X4 [Drosophila ficusphila]	1087	1087	0.94	0	0.83	XP_017053986.1
	Select seq ref|XP_016947388.1|	PREDICTED: uncharacterized protein LOC108022782 isoform X4 [Drosophila biarmipes]	1085	1085	0.94	0	0.84	XP_016947388.1
	Select seq ref|XP_016998759.1|	PREDICTED: uncharacterized protein LOC108058513 isoform X4 [Drosophila takahashii]	1084	1084	0.94	0	0.84	XP_016998759.1
	Select seq ref|XP_017053985.1|	PREDICTED: uncharacterized protein LOC108096691 isoform X3 [Drosophila ficusphila]	1083	1083	0.94	0	0.83	XP_017053985.1
	Select seq ref|XP_016998758.1|	PREDICTED: uncharacterized protein LOC108058513 isoform X3 [Drosophila takahashii]	1080	1080	0.94	0	0.84	XP_016998758.1
	Select seq ref|XP_016947387.1|	PREDICTED: uncharacterized protein LOC108022782 isoform X3 [Drosophila biarmipes]	1080	1080	0.94	0	0.84	XP_016947387.1
	Select seq ref|NP_001188990.2|	REEP1 homolog, isoform P [Drosophila melanogaster]	1080	1080	0.72	0	1	NP_001188990.2
	Select seq ref|XP_016029173.1|	uncharacterized protein Dsimw501_GD11726, isoform K [Drosophila simulans]	1060	1060	0.79	0	0.95	XP_016029173.1
	Select seq ref|XP_016029167.1|	uncharacterized protein Dsimw501_GD11726, isoform E [Drosophila simulans]	1055	1055	0.79	0	0.94	XP_016029167.1
	Select seq ref|XP_017090898.1|	PREDICTED: uncharacterized protein LOC108121372 isoform X1 [Drosophila bipectinata]	1030	1030	0.99	0	0.76	XP_017090898.1
	Select seq ref|XP_015012635.1|	uncharacterized protein Dere_GG22816, isoform C [Drosophila erecta]	1025	1025	0.77	0	0.91	XP_015012635.1
	Select seq ref|XP_014763800.1|	LOW QUALITY PROTEIN: uncharacterized protein Dana_GF13556 [Drosophila ananassae]	1022	1022	0.99	0	0.75	XP_014763800.1
	Select seq ref|XP_015012640.1|	uncharacterized protein Dere_GG22816, isoform H [Drosophila erecta]	1020	1020	0.77	0	0.91	XP_015012640.1
	Select seq ref|XP_015051541.1|	uncharacterized protein Dyak_GE14249, isoform G [Drosophila yakuba]	1013	1013	0.77	0	0.89	XP_015051541.1
	Select seq ref|XP_015051540.1|	uncharacterized protein Dyak_GE14249, isoform F [Drosophila yakuba]	1009	1009	0.77	0	0.89	XP_015051540.1
	Select seq ref|XP_016029171.1|	uncharacterized protein Dsimw501_GD11726, isoform I [Drosophila simulans]	989	989	0.74	0	0.94	XP_016029171.1
	Select seq ref|XP_017038442.1|	PREDICTED: uncharacterized protein LOC108086116 isoform X2 [Drosophila kikkawai]	983	983	0.99	0	0.76	XP_017038442.1
	Select seq ref|XP_017038441.1|	PREDICTED: uncharacterized protein LOC108086116 isoform X1 [Drosophila kikkawai]	980	980	0.99	0	0.76	XP_017038441.1
	Select seq ref|XP_017090900.1|	PREDICTED: uncharacterized protein LOC108121372 isoform X2 [Drosophila bipectinata]	968	968	0.94	0	0.75	XP_017090900.1
	Select seq ref|XP_017132066.1|	PREDICTED: uncharacterized protein LOC108149172 isoform X6 [Drosophila elegans]	943	943	0.79	0	0.83	XP_017132066.1
	Select seq ref|XP_017132065.1|	PREDICTED: uncharacterized protein LOC108149172 isoform X5 [Drosophila elegans]	939	939	0.79	0	0.83	XP_017132065.1
	Select seq ref|XP_017038444.1|	PREDICTED: uncharacterized protein LOC108086116 isoform X4 [Drosophila kikkawai]	931	931	0.94	0	0.76	XP_017038444.1
	Select seq ref|XP_017038443.1|	PREDICTED: uncharacterized protein LOC108086116 isoform X3 [Drosophila kikkawai]	928	928	0.94	0	0.75	XP_017038443.1
	Select seq ref|XP_016980827.1|	PREDICTED: uncharacterized protein LOC108045881 isoform X6 [Drosophila rhopaloa]	908	908	0.77	0	0.84	XP_016980827.1
	Select seq ref|XP_016980826.1|	PREDICTED: uncharacterized protein LOC108045881 isoform X5 [Drosophila rhopaloa]	903	903	0.77	0	0.84	XP_016980826.1
	Select seq ref|XP_004444545.1|	uncharacterized protein Dpse_GA30269, isoform G [Drosophila pseudoobscura pseudoobscura]	898	898	0.99	0	0.7	XP_004444545.1
	Select seq ref|XP_015040719.1|	uncharacterized protein Dpse_GA30269, isoform M [Drosophila pseudoobscura pseudoobscura]	894	894	0.99	0	0.7	XP_015040719.1
	Select seq ref|XP_017078775.1|	PREDICTED: uncharacterized protein LOC108112911 isoform X5 [Drosophila eugracilis]	892	892	0.79	0	0.82	XP_017078775.1
	Select seq ref|XP_017078774.1|	PREDICTED: uncharacterized protein LOC108112911 isoform X4 [Drosophila eugracilis]	889	889	0.79	0	0.82	XP_017078774.1
	Select seq ref|NP_001286750.1|	REEP1 homolog, isoform R [Drosophila melanogaster]	887	887	0.58	0	1	NP_001286750.1
	Select seq ref|XP_016929783.1|	PREDICTED: uncharacterized protein LOC108009721 isoform X6 [Drosophila suzukii]	884	884	0.77	0	0.83	XP_016929783.1
	Select seq ref|XP_017132067.1|	PREDICTED: uncharacterized protein LOC108149172 isoform X7 [Drosophila elegans]	882	882	0.74	0	0.83	XP_017132067.1
	Select seq ref|XP_016929781.1|	PREDICTED: uncharacterized protein LOC108009721 isoform X5 [Drosophila suzukii]	880	880	0.77	0	0.82	XP_016929781.1
	Select seq ref|XP_017053988.1|	PREDICTED: uncharacterized protein LOC108096691 isoform X6 [Drosophila ficusphila]	872	872	0.77	0	0.83	XP_017053988.1
	Select seq ref|XP_016998762.1|	PREDICTED: uncharacterized protein LOC108058513 isoform X6 [Drosophila takahashii]	870	870	0.77	0	0.83	XP_016998762.1
	Select seq ref|XP_016029169.1|	uncharacterized protein Dsimw501_GD11726, isoform G [Drosophila simulans]	869	869	0.58	0	0.99	XP_016029169.1
	Select seq ref|XP_016947390.1|	PREDICTED: uncharacterized protein LOC108022782 isoform X6 [Drosophila biarmipes]	868	868	0.77	0	0.82	XP_016947390.1
	Select seq ref|XP_017053987.1|	PREDICTED: uncharacterized protein LOC108096691 isoform X5 [Drosophila ficusphila]	868	868	0.77	0	0.83	XP_017053987.1
	Select seq ref|XP_016998760.1|	PREDICTED: uncharacterized protein LOC108058513 isoform X5 [Drosophila takahashii]	865	865	0.77	0	0.83	XP_016998760.1
	Select seq ref|XP_016947389.1|	PREDICTED: uncharacterized protein LOC108022782 isoform X5 [Drosophila biarmipes]	864	864	0.77	0	0.82	XP_016947389.1
	Select seq ref|XP_015051536.1|	uncharacterized protein Dyak_GE14249, isoform B [Drosophila yakuba]	863	863	0.58	0	0.97	XP_015051536.1
	Select seq ref|XP_017146557.1|	PREDICTED: uncharacterized protein LOC108158605 isoform X2 [Drosophila miranda]	860	860	0.94	0	0.7	XP_017146557.1
	Select seq ref|XP_017146556.1|	PREDICTED: uncharacterized protein LOC108158605 isoform X1 [Drosophila miranda]	856	856	0.94	0	0.7	XP_017146556.1
	Select seq ref|XP_015012639.1|	uncharacterized protein Dere_GG22816, isoform G [Drosophila erecta]	856	856	0.58	0	0.97	XP_015012639.1
	Select seq ref|XP_015040716.1|	uncharacterized protein Dpse_GA30269, isoform H [Drosophila pseudoobscura pseudoobscura]	851	851	0.94	0	0.7	XP_015040716.1
	Select seq ref|XP_016980828.1|	PREDICTED: uncharacterized protein LOC108045881 isoform X7 [Drosophila rhopaloa]	847	847	0.72	0	0.84	XP_016980828.1
	Select seq ref|XP_016929785.1|	PREDICTED: uncharacterized protein LOC108009721 isoform X8 [Drosophila suzukii]	838	838	0.58	0	0.95	XP_016929785.1
	Select seq ref|XP_016980832.1|	PREDICTED: receptor expression-enhancing protein 3-B isoform X10 [Drosophila rhopaloa]	837	837	0.58	0	0.95	XP_016980832.1
	Select seq ref|XP_016980829.1|	PREDICTED: uncharacterized protein LOC108045881 isoform X8 [Drosophila rhopaloa]	837	837	0.58	0	0.95	XP_016980829.1
	Select seq ref|XP_017132068.1|	PREDICTED: uncharacterized protein LOC108149172 isoform X8 [Drosophila elegans]	835	835	0.58	0	0.95	XP_017132068.1
	Select seq ref|XP_016929787.1|	PREDICTED: uncharacterized protein LOC108009721 isoform X10 [Drosophila suzukii]	835	835	0.58	0	0.95	XP_016929787.1
	Select seq ref|XP_017132071.1|	PREDICTED: uncharacterized protein LOC108149172 isoform X10 [Drosophila elegans]	832	832	0.58	0	0.95	XP_017132071.1
	Select seq ref|NP_611737.2|	REEP1 homolog, isoform K [Drosophila melanogaster]	831	831	0.56	0	1	NP_611737.2
	Select seq ref|XP_017078776.1|	PREDICTED: uncharacterized protein LOC108112911 isoform X6 [Drosophila eugracilis]	830	830	0.58	0	0.95	XP_017078776.1
	Select seq ref|XP_017078778.1|	PREDICTED: uncharacterized protein LOC108112911 isoform X8 [Drosophila eugracilis]	829	829	0.58	0	0.95	XP_017078778.1
	Select seq ref|XP_017053992.1|	PREDICTED: uncharacterized protein LOC108096691 isoform X9 [Drosophila ficusphila]	825	825	0.58	0	0.93	XP_017053992.1
	Select seq ref|XP_017053993.1|	PREDICTED: uncharacterized protein LOC108096691 isoform X10 [Drosophila ficusphila]	824	824	0.58	0	0.93	XP_017053993.1
	Select seq ref|XP_016929784.1|	PREDICTED: uncharacterized protein LOC108009721 isoform X7 [Drosophila suzukii]	824	824	0.72	0	0.82	XP_016929784.1
	Select seq ref|XP_016947392.1|	PREDICTED: uncharacterized protein LOC108022782 isoform X8 [Drosophila biarmipes]	822	822	0.58	0	0.95	XP_016947392.1
	Select seq ref|XP_016998764.1|	PREDICTED: uncharacterized protein LOC108058513 isoform X8 [Drosophila takahashii]	819	819	0.58	0	0.94	XP_016998764.1
	Select seq ref|XP_016998767.1|	PREDICTED: uncharacterized protein LOC108058513 isoform X10 [Drosophila takahashii]	817	817	0.58	0	0.94	XP_016998767.1
	Select seq ref|XP_017146558.1|	PREDICTED: uncharacterized protein LOC108158605 isoform X3 [Drosophila miranda]	815	815	0.94	0	0.68	XP_017146558.1
	Select seq ref|XP_015040717.1|	uncharacterized protein Dpse_GA30269, isoform I [Drosophila pseudoobscura pseudoobscura]	813	813	0.87	0	0.69	XP_015040717.1
	Select seq ref|XP_016998763.1|	PREDICTED: uncharacterized protein LOC108058513 isoform X7 [Drosophila takahashii]	812	812	0.72	0	0.83	XP_016998763.1
	Select seq ref|XP_017053989.1|	PREDICTED: uncharacterized protein LOC108096691 isoform X7 [Drosophila ficusphila]	809	809	0.72	0	0.83	XP_017053989.1
	Select seq ref|XP_016947391.1|	PREDICTED: uncharacterized protein LOC108022782 isoform X7 [Drosophila biarmipes]	805	805	0.72	0	0.82	XP_016947391.1

## Sheet: CG42678_PS
Blastp results for CG42678-PS
	Sequences producing significant alignments:
	Select:AllNone Selected:0
	AlignmentsDownloadGenPeptGraphicsDistance tree of resultsMultiple alignmentShow/hide columns of the table presenting sequences producing significant alignments
	Sequences producing significant alignments:
	Select for downloading or viewing reports	Description	Max score	Total score	Query cover	E value	Ident	Accession
	Select seq ref|NP_001286751.1|	REEP1 homolog, isoform S [Drosophila melanogaster]	649	649	1	0	1	NP_001286751.1
	Select seq ref|XP_017053995.1|	PREDICTED: receptor expression-enhancing protein 1 isoform X12 [Drosophila ficusphila]	631	631	1	0	0.97	XP_017053995.1
	Select seq ref|XP_017132072.1|	PREDICTED: receptor expression-enhancing protein 1 isoform X11 [Drosophila elegans]	630	630	1	0	0.97	XP_017132072.1
	Select seq ref|XP_016929788.1|	PREDICTED: receptor expression-enhancing protein 1 isoform X11 [Drosophila suzukii]	629	629	1	0	0.97	XP_016929788.1
	Select seq ref|XP_016947394.1|	PREDICTED: receptor expression-enhancing protein 1 isoform X10 [Drosophila biarmipes]	628	628	1	0	0.97	XP_016947394.1
	Select seq ref|XP_016980833.1|	PREDICTED: receptor expression-enhancing protein 1 isoform X11 [Drosophila rhopaloa]	627	627	1	0	0.97	XP_016980833.1
	Select seq ref|XP_016029169.1|	uncharacterized protein Dsimw501_GD11726, isoform G [Drosophila simulans]	627	627	0.96	0	1	XP_016029169.1
	Select seq ref|NP_001286750.1|	REEP1 homolog, isoform R [Drosophila melanogaster]	627	627	0.96	0	1	NP_001286750.1
	Select seq ref|XP_017078779.1|	PREDICTED: receptor expression-enhancing protein 1 isoform X9 [Drosophila eugracilis]	624	624	1	0	0.96	XP_017078779.1
	Select seq ref|XP_016998769.1|	PREDICTED: receptor expression-enhancing protein 2 isoform X12 [Drosophila takahashii]	620	620	1	0	0.96	XP_016998769.1
	Select seq ref|XP_015012639.1|	uncharacterized protein Dere_GG22816, isoform G [Drosophila erecta]	616	616	0.96	0	0.98	XP_015012639.1
	Select seq ref|XP_015051536.1|	uncharacterized protein Dyak_GE14249, isoform B [Drosophila yakuba]	613	613	0.96	0	0.98	XP_015051536.1
	Select seq ref|XP_017053993.1|	PREDICTED: uncharacterized protein LOC108096691 isoform X10 [Drosophila ficusphila]	610	610	0.96	0	0.97	XP_017053993.1
	Select seq ref|XP_017132068.1|	PREDICTED: uncharacterized protein LOC108149172 isoform X8 [Drosophila elegans]	608	608	0.96	0	0.97	XP_017132068.1
	Select seq ref|XP_016929785.1|	PREDICTED: uncharacterized protein LOC108009721 isoform X8 [Drosophila suzukii]	607	607	0.96	0	0.97	XP_016929785.1
	Select seq ref|XP_016980829.1|	PREDICTED: uncharacterized protein LOC108045881 isoform X8 [Drosophila rhopaloa]	607	607	0.96	0	0.97	XP_016980829.1
	Select seq ref|XP_016947392.1|	PREDICTED: uncharacterized protein LOC108022782 isoform X8 [Drosophila biarmipes]	606	606	0.96	0	0.97	XP_016947392.1
	Select seq ref|XP_017053992.1|	PREDICTED: uncharacterized protein LOC108096691 isoform X9 [Drosophila ficusphila]	605	605	0.96	0	0.96	XP_017053992.1
	Select seq ref|XP_017090905.1|	PREDICTED: receptor expression-enhancing protein 1 isoform X7 [Drosophila bipectinata]	598	598	1	0	0.94	XP_017090905.1
	Select seq ref|XP_016998764.1|	PREDICTED: uncharacterized protein LOC108058513 isoform X8 [Drosophila takahashii]	598	598	0.96	0	0.96	XP_016998764.1
	Select seq ref|XP_017078776.1|	PREDICTED: uncharacterized protein LOC108112911 isoform X6 [Drosophila eugracilis]	583	583	0.99	0	0.94	XP_017078776.1
	Select seq ref|NP_001188989.1|	REEP1 homolog, isoform J [Drosophila melanogaster]	580	580	0.87	0	1	NP_001188989.1
	Select seq ref|NP_001188987.1|	REEP1 homolog, isoform H [Drosophila melanogaster]	580	580	0.87	0	1	NP_001188987.1
	Select seq ref|XP_017038452.1|	PREDICTED: uncharacterized protein T19C3.4 isoform X11 [Drosophila kikkawai]	579	579	1	0	0.93	XP_017038452.1
	Select seq ref|XP_016029173.1|	uncharacterized protein Dsimw501_GD11726, isoform K [Drosophila simulans]	579	579	0.87	0	1	XP_016029173.1
	Select seq ref|XP_016029167.1|	uncharacterized protein Dsimw501_GD11726, isoform E [Drosophila simulans]	579	579	0.87	0	1	XP_016029167.1
	Select seq ref|NP_001188990.2|	REEP1 homolog, isoform P [Drosophila melanogaster]	578	578	0.87	0	1	NP_001188990.2
	Select seq ref|XP_016029171.1|	uncharacterized protein Dsimw501_GD11726, isoform I [Drosophila simulans]	577	577	0.87	0	1	XP_016029171.1
	Select seq ref|XP_017090903.1|	PREDICTED: uncharacterized protein LOC108121372 isoform X5 [Drosophila bipectinata]	576	576	0.96	0	0.94	XP_017090903.1
	Select seq ref|XP_017146566.1|	PREDICTED: receptor expression-enhancing protein 1 isoform X10 [Drosophila miranda]	575	575	1	0	0.89	XP_017146566.1
	Select seq ref|XP_015012640.1|	uncharacterized protein Dere_GG22816, isoform H [Drosophila erecta]	572	572	0.87	0	0.99	XP_015012640.1
	Select seq ref|XP_015012635.1|	uncharacterized protein Dere_GG22816, isoform C [Drosophila erecta]	572	572	0.87	0	0.99	XP_015012635.1
	Select seq ref|XP_017132066.1|	PREDICTED: uncharacterized protein LOC108149172 isoform X6 [Drosophila elegans]	571	571	0.87	0	0.99	XP_017132066.1
	Select seq ref|XP_017132065.1|	PREDICTED: uncharacterized protein LOC108149172 isoform X5 [Drosophila elegans]	571	571	0.87	0	0.99	XP_017132065.1
	Select seq ref|XP_017053988.1|	PREDICTED: uncharacterized protein LOC108096691 isoform X6 [Drosophila ficusphila]	571	571	0.87	0	0.98	XP_017053988.1
	Select seq ref|XP_017053987.1|	PREDICTED: uncharacterized protein LOC108096691 isoform X5 [Drosophila ficusphila]	571	571	0.87	0	0.98	XP_017053987.1
	Select seq ref|XP_015051540.1|	uncharacterized protein Dyak_GE14249, isoform F [Drosophila yakuba]	571	571	0.87	0	0.98	XP_015051540.1
	Select seq ref|XP_015051541.1|	uncharacterized protein Dyak_GE14249, isoform G [Drosophila yakuba]	571	571	0.87	0	0.98	XP_015051541.1
	Select seq ref|XP_017132067.1|	PREDICTED: uncharacterized protein LOC108149172 isoform X7 [Drosophila elegans]	570	570	0.87	0	0.99	XP_017132067.1
	Select seq ref|XP_016980827.1|	PREDICTED: uncharacterized protein LOC108045881 isoform X6 [Drosophila rhopaloa]	570	570	0.87	0	0.98	XP_016980827.1
	Select seq ref|XP_016980826.1|	PREDICTED: uncharacterized protein LOC108045881 isoform X5 [Drosophila rhopaloa]	570	570	0.87	0	0.98	XP_016980826.1
	Select seq ref|XP_017053989.1|	PREDICTED: uncharacterized protein LOC108096691 isoform X7 [Drosophila ficusphila]	569	569	0.87	0	0.98	XP_017053989.1
	Select seq ref|XP_016998760.1|	PREDICTED: uncharacterized protein LOC108058513 isoform X5 [Drosophila takahashii]	569	569	0.87	0	0.98	XP_016998760.1
	Select seq ref|XP_016998762.1|	PREDICTED: uncharacterized protein LOC108058513 isoform X6 [Drosophila takahashii]	569	569	0.87	0	0.98	XP_016998762.1
	Select seq ref|XP_017078775.1|	PREDICTED: uncharacterized protein LOC108112911 isoform X5 [Drosophila eugracilis]	568	568	0.87	0	0.97	XP_017078775.1
	Select seq ref|XP_017078774.1|	PREDICTED: uncharacterized protein LOC108112911 isoform X4 [Drosophila eugracilis]	568	568	0.87	0	0.97	XP_017078774.1
	Select seq ref|XP_016980828.1|	PREDICTED: uncharacterized protein LOC108045881 isoform X7 [Drosophila rhopaloa]	568	568	0.87	0	0.98	XP_016980828.1
	Select seq ref|XP_016998763.1|	PREDICTED: uncharacterized protein LOC108058513 isoform X7 [Drosophila takahashii]	567	567	0.87	0	0.98	XP_016998763.1
	Select seq ref|XP_016947389.1|	PREDICTED: uncharacterized protein LOC108022782 isoform X5 [Drosophila biarmipes]	566	566	0.87	0	0.97	XP_016947389.1
	Select seq ref|XP_016929783.1|	PREDICTED: uncharacterized protein LOC108009721 isoform X6 [Drosophila suzukii]	566	566	0.87	0	0.98	XP_016929783.1
	Select seq ref|XP_016929781.1|	PREDICTED: uncharacterized protein LOC108009721 isoform X5 [Drosophila suzukii]	566	566	0.87	0	0.98	XP_016929781.1
	Select seq ref|XP_016947390.1|	PREDICTED: uncharacterized protein LOC108022782 isoform X6 [Drosophila biarmipes]	566	566	0.87	0	0.97	XP_016947390.1
	Select seq ref|XP_016947391.1|	PREDICTED: uncharacterized protein LOC108022782 isoform X7 [Drosophila biarmipes]	565	565	0.87	0	0.97	XP_016947391.1
	Select seq ref|XP_016929784.1|	PREDICTED: uncharacterized protein LOC108009721 isoform X7 [Drosophila suzukii]	565	565	0.87	0	0.98	XP_016929784.1
	Select seq ref|XP_017038447.1|	PREDICTED: histone-lysine N-methyltransferase SETD1B isoform X6 [Drosophila kikkawai]	563	563	0.87	0	0.96	XP_017038447.1
	Select seq ref|XP_017038445.1|	PREDICTED: histone-lysine N-methyltransferase SETD1B isoform X5 [Drosophila kikkawai]	563	563	0.87	0	0.96	XP_017038445.1
	Select seq ref|XP_017038448.1|	PREDICTED: histone-lysine N-methyltransferase SETD1B isoform X7 [Drosophila kikkawai]	561	561	0.87	0	0.96	XP_017038448.1
	Select seq ref|XP_017090901.1|	PREDICTED: uncharacterized protein LOC108121372 isoform X3 [Drosophila bipectinata]	560	560	0.87	0	0.96	XP_017090901.1
	Select seq ref|NP_001188988.1|	REEP1 homolog, isoform I [Drosophila melanogaster]	558	558	0.83	0	1	NP_001188988.1
	Select seq ref|XP_016029176.1|	uncharacterized protein Dsimw501_GD11726, isoform N [Drosophila simulans]	557	557	0.83	0	1	XP_016029176.1
	Select seq ref|XP_016029164.1|	uncharacterized protein Dsimw501_GD11726, isoform B [Drosophila simulans]	557	557	0.83	0	1	XP_016029164.1
	Select seq ref|XP_017090902.1|	PREDICTED: uncharacterized protein LOC108121372 isoform X4 [Drosophila bipectinata]	557	557	0.87	0	0.96	XP_017090902.1
	Select seq ref|XP_017038449.1|	PREDICTED: uncharacterized protein LOC108086116 isoform X8 [Drosophila kikkawai]	556	556	0.99	0	0.91	XP_017038449.1
	Select seq ref|NP_001286749.1|	REEP1 homolog, isoform Q [Drosophila melanogaster]	556	556	0.83	0	1	NP_001286749.1
	Select seq ref|XP_016029170.1|	uncharacterized protein Dsimw501_GD11726, isoform H [Drosophila simulans]	556	556	0.83	0	1	XP_016029170.1
	Select seq ref|XP_017146563.1|	PREDICTED: uncharacterized protein LOC108158605 isoform X7 [Drosophila miranda]	555	555	0.96	0	0.89	XP_017146563.1
	Select seq ref|XP_015040720.1|	uncharacterized protein Dpse_GA30269, isoform N [Drosophila pseudoobscura pseudoobscura]	555	555	0.96	0	0.89	XP_015040720.1
	Select seq ref|XP_016029166.1|	uncharacterized protein Dsimw501_GD11726, isoform D [Drosophila simulans]	555	555	0.83	0	1	XP_016029166.1
	Select seq ref|XP_015012638.1|	uncharacterized protein Dere_GG22816, isoform F [Drosophila erecta]	551	551	0.83	0	0.98	XP_015012638.1
	Select seq ref|XP_015012637.1|	uncharacterized protein Dere_GG22816, isoform E [Drosophila erecta]	550	550	0.83	0	0.98	XP_015012637.1
	Select seq ref|XP_017132062.1|	PREDICTED: uncharacterized protein LOC108149172 isoform X2 [Drosophila elegans]	550	550	0.83	0	0.98	XP_017132062.1
	Select seq ref|XP_017132060.1|	PREDICTED: uncharacterized protein LOC108149172 isoform X1 [Drosophila elegans]	550	550	0.83	0	0.98	XP_017132060.1
	Select seq ref|XP_017053984.1|	PREDICTED: uncharacterized protein LOC108096691 isoform X2 [Drosophila ficusphila]	550	550	0.86	0	0.96	XP_017053984.1
	Select seq ref|XP_017053983.1|	PREDICTED: uncharacterized protein LOC108096691 isoform X1 [Drosophila ficusphila]	550	550	0.86	0	0.96	XP_017053983.1
	Select seq ref|XP_017132064.1|	PREDICTED: uncharacterized protein LOC108149172 isoform X4 [Drosophila elegans]	549	549	0.83	0	0.98	XP_017132064.1
	Select seq ref|XP_017132063.1|	PREDICTED: uncharacterized protein LOC108149172 isoform X3 [Drosophila elegans]	549	549	0.83	0	0.98	XP_017132063.1
	Select seq ref|XP_017053985.1|	PREDICTED: uncharacterized protein LOC108096691 isoform X3 [Drosophila ficusphila]	548	548	0.86	0	0.96	XP_017053985.1
	Select seq ref|XP_015051539.1|	uncharacterized protein Dyak_GE14249, isoform E [Drosophila yakuba]	548	548	0.83	0	0.98	XP_015051539.1
	Select seq ref|XP_015051537.1|	uncharacterized protein Dyak_GE14249, isoform C [Drosophila yakuba]	548	548	0.83	0	0.98	XP_015051537.1
	Select seq ref|XP_017053986.1|	PREDICTED: uncharacterized protein LOC108096691 isoform X4 [Drosophila ficusphila]	548	548	0.86	0	0.96	XP_017053986.1
	Select seq ref|XP_016980823.1|	PREDICTED: uncharacterized protein LOC108045881 isoform X2 [Drosophila rhopaloa]	548	548	0.83	0	0.98	XP_016980823.1
	Select seq ref|XP_016980822.1|	PREDICTED: uncharacterized protein LOC108045881 isoform X1 [Drosophila rhopaloa]	548	548	0.83	0	0.98	XP_016980822.1
	Select seq ref|XP_015034453.1|	uncharacterized protein Dwil_GK19544, isoform C [Drosophila willistoni]	548	548	0.96	0	0.87	XP_015034453.1
	Select seq ref|XP_015051538.1|	uncharacterized protein Dyak_GE14249, isoform D [Drosophila yakuba]	547	547	0.83	0	0.98	XP_015051538.1
	Select seq ref|XP_016980825.1|	PREDICTED: uncharacterized protein LOC108045881 isoform X4 [Drosophila rhopaloa]	547	547	0.83	0	0.98	XP_016980825.1
	Select seq ref|XP_016980824.1|	PREDICTED: uncharacterized protein LOC108045881 isoform X3 [Drosophila rhopaloa]	547	547	0.83	0	0.98	XP_016980824.1
	Select seq ref|XP_016998757.1|	PREDICTED: uncharacterized protein LOC108058513 isoform X2 [Drosophila takahashii]	547	547	0.83	0	0.98	XP_016998757.1
	Select seq ref|XP_016998756.1|	PREDICTED: uncharacterized protein LOC108058513 isoform X1 [Drosophila takahashii]	547	547	0.83	0	0.98	XP_016998756.1
	Select seq ref|XP_017132071.1|	PREDICTED: uncharacterized protein LOC108149172 isoform X10 [Drosophila elegans]	546	546	0.86	0	0.96	XP_017132071.1
	Select seq ref|XP_016998759.1|	PREDICTED: uncharacterized protein LOC108058513 isoform X4 [Drosophila takahashii]	546	546	0.83	0	0.98	XP_016998759.1
	Select seq ref|XP_016998758.1|	PREDICTED: uncharacterized protein LOC108058513 isoform X3 [Drosophila takahashii]	546	546	0.83	0	0.98	XP_016998758.1
	Select seq ref|XP_017078772.1|	PREDICTED: uncharacterized protein LOC108112911 isoform X2 [Drosophila eugracilis]	545	545	0.87	0	0.94	XP_017078772.1
	Select seq ref|XP_015020094.1|	uncharacterized protein Dmoj_GI21304, isoform D [Drosophila mojavensis]	545	545	1	0	0.84	XP_015020094.1
	Select seq ref|XP_017078771.1|	PREDICTED: uncharacterized protein LOC108112911 isoform X1 [Drosophila eugracilis]	545	545	0.87	0	0.94	XP_017078771.1
	Select seq ref|XP_016947384.1|	PREDICTED: uncharacterized protein LOC108022782 isoform X1 [Drosophila biarmipes]	545	545	0.83	0	0.97	XP_016947384.1
	Select seq ref|XP_016929777.1|	PREDICTED: uncharacterized protein LOC108009721 isoform X2 [Drosophila suzukii]	545	545	0.83	0	0.98	XP_016929777.1
	Select seq ref|XP_016929776.1|	PREDICTED: uncharacterized protein LOC108009721 isoform X1 [Drosophila suzukii]	545	545	0.83	0	0.98	XP_016929776.1
	Select seq ref|XP_016947385.1|	PREDICTED: uncharacterized protein LOC108022782 isoform X2 [Drosophila biarmipes]	545	545	0.83	0	0.97	XP_016947385.1
	Select seq ref|XP_016929779.1|	PREDICTED: uncharacterized protein LOC108009721 isoform X4 [Drosophila suzukii]	545	545	0.83	0	0.98	XP_016929779.1
	Select seq ref|XP_016929778.1|	PREDICTED: uncharacterized protein LOC108009721 isoform X3 [Drosophila suzukii]	545	545	0.83	0	0.98	XP_016929778.1

## Sheet: CG8331_PA
Blastp results for CG8331- PA
	Sequences producing significant alignments:
	Select:AllNone Selected:0
	AlignmentsDownloadGenPeptGraphicsDistance tree of resultsMultiple alignmentShow/hide columns of the table presenting sequences producing significant alignments
	Sequences producing significant alignments:
	Select for downloading or viewing reports	Description	Max score	Total score	Query cover	E value	Ident	Accession
	Select seq ref|NP_610936.2|	CG8331, isoform A [Drosophila melanogaster]	368	368	1	2e-129	1	NP_610936.2
	Select seq ref|XP_002033803.1|	GM21516 [Drosophila sechellia]	360	360	0.98	3e-126	0.98	XP_002033803.1
	Select seq ref|XP_016973662.1|	PREDICTED: receptor expression-enhancing protein 5 isoform X1 [Drosophila rhopaloa]	344	344	0.98	9e-120	0.92	XP_016973662.1
	Select seq ref|XP_016968801.1|	PREDICTED: receptor expression-enhancing protein 5 isoform X1 [Drosophila biarmipes]	343	343	0.98	2e-119	0.91	XP_016968801.1
	Select seq ref|XP_002091270.1|	uncharacterized protein Dyak_GE13560, isoform A [Drosophila yakuba]	342	342	0.98	4e-119	0.92	XP_002091270.1
	Select seq ref|XP_017015363.1|	PREDICTED: receptor expression-enhancing protein 5 isoform X3 [Drosophila takahashii]	342	342	0.98	4e-119	0.92	XP_017015363.1
	Select seq ref|XP_017133054.1|	PREDICTED: receptor expression-enhancing protein 5 isoform X1 [Drosophila elegans]	338	338	0.98	1e-117	0.9	XP_017133054.1
	Select seq ref|XP_016929116.1|	PREDICTED: receptor expression-enhancing protein 5 isoform X1 [Drosophila suzukii]	338	338	0.98	2e-117	0.9	XP_016929116.1
	Select seq ref|XP_017019815.1|	PREDICTED: receptor expression-enhancing protein 5 isoform X2 [Drosophila kikkawai]	335	335	0.98	2e-116	0.89	XP_017019815.1
	Select seq ref|XP_001975674.2|	uncharacterized protein Dere_GG20429, isoform D [Drosophila erecta]	334	334	0.98	5e-116	0.9	XP_001975674.2
	Select seq ref|XP_017049594.1|	PREDICTED: receptor expression-enhancing protein 5 isoform X1 [Drosophila ficusphila]	322	322	0.98	3e-111	0.87	XP_017049594.1
	Select seq ref|XP_017069015.1|	PREDICTED: receptor expression-enhancing protein 5 isoform X1 [Drosophila eugracilis]	322	322	0.98	4e-111	0.85	XP_017069015.1
	Select seq ref|XP_001959484.1|	uncharacterized protein Dana_GF12032, isoform A [Drosophila ananassae]	321	321	1	9e-111	0.84	XP_001959484.1
	Select seq ref|XP_017087905.1|	PREDICTED: receptor expression-enhancing protein 5 isoform X1 [Drosophila bipectinata]	313	313	1	1e-107	0.81	XP_017087905.1
	Select seq ref|XP_017146378.1|	PREDICTED: receptor expression-enhancing protein 5 isoform X1 [Drosophila miranda]	308	308	0.98	1e-105	0.81	XP_017146378.1
	Select seq ref|XP_002017636.1|	GL17205 [Drosophila persimilis]	306	306	0.98	8e-105	0.8	XP_002017636.1
	Select seq ref|XP_002098992.1|	uncharacterized protein Dyak_GE10663 [Drosophila yakuba]	302	302	0.92	3e-103	0.85	XP_002098992.1
	Select seq ref|XP_001981752.1|	uncharacterized protein Dere_GG12216 [Drosophila erecta]	299	299	0.89	3e-102	0.87	XP_001981752.1
	Select seq ref|XP_002050707.1|	uncharacterized protein Dvir_GJ20059, isoform A [Drosophila virilis]	296	296	0.98	9e-101	0.78	XP_002050707.1
	Select seq ref|XP_002063118.1|	uncharacterized protein Dwil_GK21552, isoform A [Drosophila willistoni]	295	295	0.98	2e-100	0.8	XP_002063118.1
	Select seq ref|XP_002005410.1|	uncharacterized protein Dmoj_GI19086, isoform A [Drosophila mojavensis]	289	289	0.98	3e-98	0.76	XP_002005410.1
	Select seq ref|XP_002104968.2|	LOW QUALITY PROTEIN: uncharacterized protein Dsimw501_GD18168 [Drosophila simulans]	282	282	0.99	2e-95	0.75	XP_002104968.2
	Select seq ref|NP_651429.1|	CG4960, isoform A [Drosophila melanogaster]	281	281	0.98	3e-95	0.75	NP_651429.1
	Select seq ref|XP_001987298.1|	GH21843 [Drosophila grimshawi]	281	281	1	5e-95	0.75	XP_001987298.1
	Select seq ref|NP_001188927.1|	CG8331, isoform C [Drosophila melanogaster]	274	274	0.73	2e-92	1	NP_001188927.1
	Select seq ref|NP_001188926.1|	CG8331, isoform B [Drosophila melanogaster]	274	274	0.8	2e-92	0.92	NP_001188926.1
	Select seq ref|XP_016027548.1|	uncharacterized protein Dsimw501_GD11027, isoform C [Drosophila simulans]	272	272	0.73	7e-92	0.99	XP_016027548.1
	Select seq ref|XP_016027547.1|	uncharacterized protein Dsimw501_GD11027, isoform B [Drosophila simulans]	271	271	0.8	2e-91	0.92	XP_016027547.1
	Select seq ref|XP_002041295.1|	GM10217 [Drosophila sechellia]	271	271	0.86	3e-91	0.81	XP_002041295.1
	Select seq ref|XP_005174825.1|	PREDICTED: receptor expression-enhancing protein 5 isoform X1 [Musca domestica]	268	268	1	6e-90	0.66	XP_005174825.1
	Select seq ref|XP_016973665.1|	PREDICTED: receptor expression-enhancing protein 5 isoform X3 [Drosophila rhopaloa]	267	267	0.73	7e-90	0.97	XP_016973665.1
	Select seq ref|XP_016973664.1|	PREDICTED: receptor expression-enhancing protein 5 isoform X2 [Drosophila rhopaloa]	266	266	0.78	2e-89	0.93	XP_016973664.1
	Select seq ref|XP_017133055.1|	PREDICTED: receptor expression-enhancing protein 5 isoform X2 [Drosophila elegans]	266	266	0.8	3e-89	0.88	XP_017133055.1
	Select seq ref|XP_017019816.1|	PREDICTED: receptor expression-enhancing protein 5 isoform X3 [Drosophila kikkawai]	264	264	0.78	1e-88	0.91	XP_017019816.1
	Select seq ref|XP_015052635.1|	uncharacterized protein Dyak_GE13560, isoform B [Drosophila yakuba]	264	264	0.78	1e-88	0.91	XP_015052635.1
	Select seq ref|XP_016968803.1|	PREDICTED: receptor expression-enhancing protein 5 isoform X3 [Drosophila biarmipes]	264	264	0.78	2e-88	0.91	XP_016968803.1
	Select seq ref|XP_017133056.1|	PREDICTED: receptor expression-enhancing protein 5 isoform X3 [Drosophila elegans]	263	263	0.78	2e-88	0.9	XP_017133056.1
	Select seq ref|XP_017019814.1|	PREDICTED: receptor expression-enhancing protein 5 isoform X1 [Drosophila kikkawai]	263	263	0.82	3e-88	0.86	XP_017019814.1
	Select seq ref|XP_015052634.1|	uncharacterized protein Dyak_GE13560, isoform C [Drosophila yakuba]	263	263	0.8	3e-88	0.88	XP_015052634.1
	Select seq ref|XP_017015361.1|	PREDICTED: receptor expression-enhancing protein 5 isoform X1 [Drosophila takahashii]	262	262	0.8	9e-88	0.88	XP_017015361.1
	Select seq ref|XP_017015362.1|	PREDICTED: receptor expression-enhancing protein 5 isoform X2 [Drosophila takahashii]	261	261	0.78	1e-87	0.9	XP_017015362.1
	Select seq ref|XP_016968802.1|	PREDICTED: receptor expression-enhancing protein 5 isoform X2 [Drosophila biarmipes]	260	260	0.73	5e-87	0.95	XP_016968802.1
	Select seq ref|XP_016929118.1|	PREDICTED: receptor expression-enhancing protein 5 isoform X3 [Drosophila suzukii]	259	259	0.78	1e-86	0.89	XP_016929118.1
	Select seq ref|XP_017069017.1|	PREDICTED: receptor expression-enhancing protein 5 isoform X2 [Drosophila eugracilis]	259	259	0.8	2e-86	0.85	XP_017069017.1
	Select seq ref|XP_017069018.1|	PREDICTED: receptor expression-enhancing protein 5 isoform X3 [Drosophila eugracilis]	258	258	0.73	3e-86	0.93	XP_017069018.1
	Select seq ref|XP_015011652.1|	uncharacterized protein Dere_GG20429, isoform C [Drosophila erecta]	257	257	0.78	9e-86	0.88	XP_015011652.1
	Select seq ref|XP_014763053.1|	uncharacterized protein Dana_GF12032, isoform B [Drosophila ananassae]	257	257	0.78	1e-85	0.88	XP_014763053.1
	Select seq ref|XP_016929117.1|	PREDICTED: receptor expression-enhancing protein 5 isoform X2 [Drosophila suzukii]	257	257	0.76	1e-85	0.91	XP_016929117.1
	Select seq ref|XP_015011651.1|	uncharacterized protein Dere_GG20429, isoform B [Drosophila erecta]	256	256	0.8	2e-85	0.85	XP_015011651.1
	Select seq ref|XP_014763054.1|	uncharacterized protein Dana_GF12032, isoform C [Drosophila ananassae]	256	256	0.82	3e-85	0.84	XP_014763054.1
	Select seq ref|XP_017087906.1|	PREDICTED: receptor expression-enhancing protein 5 isoform X2 [Drosophila bipectinata]	252	252	0.82	1e-83	0.81	XP_017087906.1
	Select seq ref|XP_015040570.1|	uncharacterized protein Dpse_GA20994, isoform B [Drosophila pseudoobscura pseudoobscura]	251	251	0.73	2e-83	0.89	XP_015040570.1
	Select seq ref|XP_015040571.1|	uncharacterized protein Dpse_GA20994, isoform C [Drosophila pseudoobscura pseudoobscura]	250	250	0.82	5e-83	0.8	XP_015040571.1
	Select seq ref|XP_015034215.1|	uncharacterized protein Dwil_GK21552, isoform C [Drosophila willistoni]	246	246	0.82	1e-81	0.81	XP_015034215.1
	Select seq ref|XP_011209720.1|	PREDICTED: receptor expression-enhancing protein 5 isoform X1 [Bactrocera dorsalis]	246	246	0.96	3e-81	0.64	XP_011209720.1
	Select seq ref|XP_017049596.1|	PREDICTED: receptor expression-enhancing protein 5 isoform X3 [Drosophila ficusphila]	245	245	0.78	3e-81	0.85	XP_017049596.1
	Select seq ref|XP_004534909.1|	PREDICTED: receptor expression-enhancing protein 5 isoform X1 [Ceratitis capitata]	246	246	0.96	5e-81	0.64	XP_004534909.1
	Select seq ref|XP_014101051.1|	PREDICTED: receptor expression-enhancing protein 5 isoform X1 [Bactrocera oleae]	246	246	0.96	5e-81	0.64	XP_014101051.1
	Select seq ref|XP_015034214.1|	uncharacterized protein Dwil_GK21552, isoform B [Drosophila willistoni]	244	244	0.73	8e-81	0.88	XP_015034214.1
	Select seq ref|XP_017049595.1|	PREDICTED: receptor expression-enhancing protein 5 isoform X2 [Drosophila ficusphila]	244	244	0.78	1e-80	0.86	XP_017049595.1
	Select seq ref|XP_011196530.1|	PREDICTED: receptor expression-enhancing protein 6 isoform X1 [Bactrocera cucurbitae]	245	245	0.96	1e-80	0.64	XP_011196530.1
	Select seq ref|XP_015029099.1|	uncharacterized protein Dvir_GJ20059, isoform C [Drosophila virilis]	241	241	0.73	1e-79	0.85	XP_015029099.1
	Select seq ref|XP_015029098.1|	uncharacterized protein Dvir_GJ20059, isoform B [Drosophila virilis]	240	240	0.73	4e-79	0.85	XP_015029098.1
	Select seq ref|XP_015019214.1|	uncharacterized protein Dmoj_GI19086, isoform B [Drosophila mojavensis]	232	232	0.82	7e-76	0.76	XP_015019214.1
	Select seq ref|XP_013113797.1|	PREDICTED: receptor expression-enhancing protein 5 isoform X1 [Stomoxys calcitrans]	217	217	0.92	6e-70	0.61	XP_013113797.1
	Select seq ref|XP_005174827.1|	PREDICTED: receptor expression-enhancing protein 5 isoform X2 [Musca domestica]	215	215	0.8	3e-69	0.67	XP_005174827.1
	Select seq ref|XP_013113799.1|	PREDICTED: receptor expression-enhancing protein 5 isoform X2 [Stomoxys calcitrans]	212	212	0.73	4e-68	0.71	XP_013113799.1
	Select seq ref|XP_971918.2|	PREDICTED: receptor expression-enhancing protein 5 [Tribolium castaneum]	210	210	0.98	4e-67	0.53	XP_971918.2
	Select seq ref|XP_317989.3|	AGAP004819-PC [Anopheles gambiae str. PEST]	207	207	0.97	6e-66	0.55	XP_317989.3
	Select seq ref|XP_011554780.1|	PREDICTED: receptor expression-enhancing protein 6-like isoform X2 [Plutella xylostella]	207	207	0.99	7e-66	0.51	XP_011554780.1
	Select seq ref|XP_011554781.1|	PREDICTED: receptor expression-enhancing protein 6-like isoform X3 [Plutella xylostella]	206	206	0.95	2e-65	0.52	XP_011554781.1
	Select seq ref|XP_011209722.1|	PREDICTED: receptor expression-enhancing protein 5 isoform X3 [Bactrocera dorsalis]	204	204	0.79	5e-65	0.65	XP_011209722.1
	Select seq ref|XP_004534911.1|	PREDICTED: receptor expression-enhancing protein 5 isoform X3 [Ceratitis capitata]	204	204	0.79	9e-65	0.64	XP_004534911.1
	Select seq ref|XP_001653851.1|	AAEL009604-PB [Aedes aegypti]	204	204	0.97	1e-64	0.52	XP_001653851.1
	Select seq ref|XP_011196532.1|	PREDICTED: receptor expression-enhancing protein 5 isoform X3 [Bactrocera cucurbitae]	203	203	0.79	2e-64	0.64	XP_011196532.1
	Select seq ref|XP_013195130.1|	PREDICTED: receptor expression-enhancing protein 5 isoform X3 [Amyelois transitella]	203	203	0.96	3e-64	0.51	XP_013195130.1
	Select seq ref|XP_014101171.1|	PREDICTED: receptor expression-enhancing protein 5 isoform X3 [Bactrocera oleae]	202	202	0.79	3e-64	0.65	XP_014101171.1
	Select seq ref|XP_011196534.1|	PREDICTED: receptor expression-enhancing protein 5 isoform X4 [Bactrocera cucurbitae]	202	202	0.77	5e-64	0.68	XP_011196534.1
	Select seq ref|XP_011554778.1|	PREDICTED: receptor expression-enhancing protein 6-like isoform X1 [Plutella xylostella]	203	203	0.92	6e-64	0.53	XP_011554778.1
	Select seq ref|XP_014371444.1|	PREDICTED: receptor expression-enhancing protein 5-like isoform X3 [Papilio machaon]	201	201	0.9	1e-63	0.54	XP_014371444.1
	Select seq ref|XP_013195129.1|	PREDICTED: receptor expression-enhancing protein 5 isoform X2 [Amyelois transitella]	201	201	1	1e-63	0.48	XP_013195129.1
	Select seq ref|XP_014480529.1|	PREDICTED: receptor expression-enhancing protein 5-like [Dinoponera quadriceps]	201	201	0.91	2e-63	0.55	XP_014480529.1
	Select seq ref|XP_004534910.1|	PREDICTED: receptor expression-enhancing protein 5 isoform X2 [Ceratitis capitata]	201	201	0.72	2e-63	0.71	XP_004534910.1
	Select seq ref|XP_011209721.1|	PREDICTED: receptor expression-enhancing protein 5 isoform X2 [Bactrocera dorsalis]	200	200	0.69	2e-63	0.73	XP_011209721.1
	Select seq ref|XP_011152252.1|	PREDICTED: receptor expression-enhancing protein 5 isoform X1 [Harpegnathos saltator]	201	201	0.91	2e-63	0.54	XP_011152252.1
	Select seq ref|XP_011196531.1|	PREDICTED: receptor expression-enhancing protein 5 isoform X2 [Bactrocera cucurbitae]	200	200	0.7	3e-63	0.72	XP_011196531.1
	Select seq ref|XP_011152254.1|	PREDICTED: receptor expression-enhancing protein 5 isoform X2 [Harpegnathos saltator]	201	201	0.91	3e-63	0.55	XP_011152254.1
	Select seq ref|XP_013147907.1|	PREDICTED: receptor expression-enhancing protein 5-like isoform X3 [Papilio polytes]	200	200	0.9	3e-63	0.53	XP_013147907.1
	Select seq ref|XP_014371443.1|	PREDICTED: receptor expression-enhancing protein 5-like isoform X2 [Papilio machaon]	200	200	0.93	4e-63	0.52	XP_014371443.1
	Select seq ref|XP_013195128.1|	PREDICTED: receptor expression-enhancing protein 5 isoform X1 [Amyelois transitella]	201	201	0.94	4e-63	0.5	XP_013195128.1
	Select seq ref|NP_001040329.1|	receptor expression enhancing protein isoform 2 [Bombyx mori]	200	200	0.9	4e-63	0.52	NP_001040329.1
	Select seq ref|XP_014101112.1|	PREDICTED: receptor expression-enhancing protein 5 isoform X2 [Bactrocera oleae]	200	200	0.69	5e-63	0.73	XP_014101112.1
	Select seq ref|NP_001299640.1|	receptor expression-enhancing protein 5 [Papilio xuthus]	200	200	0.9	5e-63	0.53	NP_001299640.1
	Select seq ref|XP_013164095.1|	PREDICTED: receptor expression-enhancing protein 5 isoform X4 [Papilio xuthus]	199	199	0.89	5e-63	0.54	XP_013164095.1
	Select seq ref|XP_013147904.1|	PREDICTED: receptor expression-enhancing protein 5-like isoform X1 [Papilio polytes]	200	200	0.91	1e-62	0.53	XP_013147904.1
	Select seq ref|XP_014371442.1|	PREDICTED: receptor expression-enhancing protein 5-like isoform X1 [Papilio machaon]	200	200	0.89	1e-62	0.54	XP_014371442.1
	Select seq ref|XP_013164092.1|	PREDICTED: receptor expression-enhancing protein 5 isoform X1 [Papilio xuthus]	200	200	0.91	1e-62	0.54	XP_013164092.1
	Select seq ref|XP_013147906.1|	PREDICTED: receptor expression-enhancing protein 5-like isoform X2 [Papilio polytes]	199	199	0.93	1e-62	0.51	XP_013147906.1
	Select seq ref|XP_013164093.1|	PREDICTED: receptor expression-enhancing protein 5 isoform X2 [Papilio xuthus]	199	199	0.93	2e-62	0.51	XP_013164093.1
	Select seq ref|XP_002425464.1|	Receptor expression-enhancing protein, putative [Pediculus humanus corporis]	198	198	0.91	3e-62	0.55	XP_002425464.1

## Sheet: CG4960_PB
Blastp results for CG4960- PB
	Sequences producing significant alignments:
	Select:AllNone Selected:0
	AlignmentsDownloadGenPeptGraphicsDistance tree of resultsMultiple alignmentShow/hide columns of the table presenting sequences producing significant alignments
	Sequences producing significant alignments:
	Select for downloading or viewing reports	Description	Max score	Total score	Query cover	E value	Ident	Accession
	Select seq ref|NP_651429.1|	CG4960, isoform A [Drosophila melanogaster]	363	363	1	9e-128	1	NP_651429.1
	Select seq ref|XP_002104968.2|	LOW QUALITY PROTEIN: uncharacterized protein Dsimw501_GD18168 [Drosophila simulans]	343	343	1	9e-120	0.92	XP_002104968.2
	Select seq ref|XP_002041295.1|	GM10217 [Drosophila sechellia]	321	321	0.98	6e-111	0.89	XP_002041295.1
	Select seq ref|XP_002098992.1|	uncharacterized protein Dyak_GE10663 [Drosophila yakuba]	295	295	0.95	1e-100	0.8	XP_002098992.1
	Select seq ref|XP_016973662.1|	PREDICTED: receptor expression-enhancing protein 5 isoform X1 [Drosophila rhopaloa]	295	295	1	2e-100	0.77	XP_016973662.1
	Select seq ref|XP_002033803.1|	GM21516 [Drosophila sechellia]	293	293	1	5e-100	0.77	XP_002033803.1
	Select seq ref|XP_017133054.1|	PREDICTED: receptor expression-enhancing protein 5 isoform X1 [Drosophila elegans]	292	292	1	1e-99	0.76	XP_017133054.1
	Select seq ref|XP_017019815.1|	PREDICTED: receptor expression-enhancing protein 5 isoform X2 [Drosophila kikkawai]	292	292	1	2e-99	0.76	XP_017019815.1
	Select seq ref|XP_016968801.1|	PREDICTED: receptor expression-enhancing protein 5 isoform X1 [Drosophila biarmipes]	291	291	1	7e-99	0.75	XP_016968801.1
	Select seq ref|XP_001981752.1|	uncharacterized protein Dere_GG12216 [Drosophila erecta]	289	289	0.94	2e-98	0.82	XP_001981752.1
	Select seq ref|XP_017015363.1|	PREDICTED: receptor expression-enhancing protein 5 isoform X3 [Drosophila takahashii]	288	288	1	1e-97	0.75	XP_017015363.1
	Select seq ref|XP_002091270.1|	uncharacterized protein Dyak_GE13560, isoform A [Drosophila yakuba]	288	288	1	1e-97	0.75	XP_002091270.1
	Select seq ref|XP_016929116.1|	PREDICTED: receptor expression-enhancing protein 5 isoform X1 [Drosophila suzukii]	287	287	1	2e-97	0.75	XP_016929116.1
	Select seq ref|XP_017069015.1|	PREDICTED: receptor expression-enhancing protein 5 isoform X1 [Drosophila eugracilis]	283	283	1	9e-96	0.76	XP_017069015.1
	Select seq ref|NP_610936.2|	CG8331, isoform A [Drosophila melanogaster]	281	281	0.97	3e-95	0.75	NP_610936.2
	Select seq ref|XP_001975674.2|	uncharacterized protein Dere_GG20429, isoform D [Drosophila erecta]	280	280	0.98	2e-94	0.75	XP_001975674.2
	Select seq ref|XP_017049594.1|	PREDICTED: receptor expression-enhancing protein 5 isoform X1 [Drosophila ficusphila]	277	277	1	2e-93	0.73	XP_017049594.1
	Select seq ref|XP_001959484.1|	uncharacterized protein Dana_GF12032, isoform A [Drosophila ananassae]	277	277	1	3e-93	0.72	XP_001959484.1
	Select seq ref|XP_017087905.1|	PREDICTED: receptor expression-enhancing protein 5 isoform X1 [Drosophila bipectinata]	266	266	1	4e-89	0.69	XP_017087905.1
	Select seq ref|XP_002017636.1|	GL17205 [Drosophila persimilis]	261	261	0.98	6e-87	0.71	XP_002017636.1
	Select seq ref|XP_017146378.1|	PREDICTED: receptor expression-enhancing protein 5 isoform X1 [Drosophila miranda]	259	259	0.98	2e-86	0.69	XP_017146378.1
	Select seq ref|XP_002063118.1|	uncharacterized protein Dwil_GK21552, isoform A [Drosophila willistoni]	252	252	0.94	2e-83	0.7	XP_002063118.1
	Select seq ref|XP_002050707.1|	uncharacterized protein Dvir_GJ20059, isoform A [Drosophila virilis]	251	251	0.94	5e-83	0.69	XP_002050707.1
	Select seq ref|XP_002005410.1|	uncharacterized protein Dmoj_GI19086, isoform A [Drosophila mojavensis]	243	243	0.98	3e-80	0.64	XP_002005410.1
	Select seq ref|XP_001987298.1|	GH21843 [Drosophila grimshawi]	243	243	1	8e-80	0.65	XP_001987298.1
	Select seq ref|XP_005174825.1|	PREDICTED: receptor expression-enhancing protein 5 isoform X1 [Musca domestica]	229	229	0.91	2e-74	0.62	XP_005174825.1
	Select seq ref|XP_011209720.1|	PREDICTED: receptor expression-enhancing protein 5 isoform X1 [Bactrocera dorsalis]	221	221	0.91	2e-71	0.61	XP_011209720.1
	Select seq ref|XP_004534909.1|	PREDICTED: receptor expression-enhancing protein 5 isoform X1 [Ceratitis capitata]	221	221	0.91	3e-71	0.61	XP_004534909.1
	Select seq ref|XP_014101051.1|	PREDICTED: receptor expression-enhancing protein 5 isoform X1 [Bactrocera oleae]	221	221	0.91	3e-71	0.61	XP_014101051.1
	Select seq ref|XP_011196530.1|	PREDICTED: receptor expression-enhancing protein 6 isoform X1 [Bactrocera cucurbitae]	220	220	0.91	8e-71	0.61	XP_011196530.1
	Select seq ref|XP_017019816.1|	PREDICTED: receptor expression-enhancing protein 5 isoform X3 [Drosophila kikkawai]	208	208	0.81	1e-66	0.69	XP_017019816.1
	Select seq ref|XP_017069017.1|	PREDICTED: receptor expression-enhancing protein 5 isoform X2 [Drosophila eugracilis]	208	208	0.78	1e-66	0.71	XP_017069017.1
	Select seq ref|XP_017133055.1|	PREDICTED: receptor expression-enhancing protein 5 isoform X2 [Drosophila elegans]	208	208	0.78	2e-66	0.71	XP_017133055.1
	Select seq ref|XP_017069018.1|	PREDICTED: receptor expression-enhancing protein 5 isoform X3 [Drosophila eugracilis]	207	207	0.68	2e-66	0.79	XP_017069018.1
	Select seq ref|NP_001188927.1|	CG8331, isoform C [Drosophila melanogaster]	207	207	0.81	3e-66	0.69	NP_001188927.1
	Select seq ref|XP_017133056.1|	PREDICTED: receptor expression-enhancing protein 5 isoform X3 [Drosophila elegans]	207	207	0.75	3e-66	0.73	XP_017133056.1
	Select seq ref|XP_016973665.1|	PREDICTED: receptor expression-enhancing protein 5 isoform X3 [Drosophila rhopaloa]	207	207	0.81	3e-66	0.68	XP_016973665.1
	Select seq ref|XP_016027548.1|	uncharacterized protein Dsimw501_GD11027, isoform C [Drosophila simulans]	207	207	0.81	5e-66	0.68	XP_016027548.1
	Select seq ref|XP_014763053.1|	uncharacterized protein Dana_GF12032, isoform B [Drosophila ananassae]	207	207	0.9	6e-66	0.64	XP_014763053.1
	Select seq ref|NP_001188926.1|	CG8331, isoform B [Drosophila melanogaster]	206	206	0.75	1e-65	0.73	NP_001188926.1
	Select seq ref|XP_016027547.1|	uncharacterized protein Dsimw501_GD11027, isoform B [Drosophila simulans]	206	206	0.75	1e-65	0.73	XP_016027547.1
	Select seq ref|XP_016968803.1|	PREDICTED: receptor expression-enhancing protein 5 isoform X3 [Drosophila biarmipes]	205	205	0.81	2e-65	0.68	XP_016968803.1
	Select seq ref|XP_016973664.1|	PREDICTED: receptor expression-enhancing protein 5 isoform X2 [Drosophila rhopaloa]	205	205	0.75	3e-65	0.73	XP_016973664.1
	Select seq ref|XP_017019814.1|	PREDICTED: receptor expression-enhancing protein 5 isoform X1 [Drosophila kikkawai]	205	205	0.8	3e-65	0.69	XP_017019814.1
	Select seq ref|XP_015052635.1|	uncharacterized protein Dyak_GE13560, isoform B [Drosophila yakuba]	204	204	0.82	5e-65	0.67	XP_015052635.1
	Select seq ref|XP_017015362.1|	PREDICTED: receptor expression-enhancing protein 5 isoform X2 [Drosophila takahashii]	203	203	0.81	1e-64	0.68	XP_017015362.1
	Select seq ref|XP_014763054.1|	uncharacterized protein Dana_GF12032, isoform C [Drosophila ananassae]	202	202	0.8	4e-64	0.69	XP_014763054.1
	Select seq ref|XP_015040570.1|	uncharacterized protein Dpse_GA20994, isoform B [Drosophila pseudoobscura pseudoobscura]	201	201	0.8	9e-64	0.69	XP_015040570.1
	Select seq ref|XP_015052634.1|	uncharacterized protein Dyak_GE13560, isoform C [Drosophila yakuba]	201	201	0.75	1e-63	0.71	XP_015052634.1
	Select seq ref|XP_017015361.1|	PREDICTED: receptor expression-enhancing protein 5 isoform X1 [Drosophila takahashii]	201	201	0.78	1e-63	0.69	XP_017015361.1
	Select seq ref|XP_016929118.1|	PREDICTED: receptor expression-enhancing protein 5 isoform X3 [Drosophila suzukii]	201	201	0.81	1e-63	0.67	XP_016929118.1
	Select seq ref|XP_016968802.1|	PREDICTED: receptor expression-enhancing protein 5 isoform X2 [Drosophila biarmipes]	199	199	0.74	4e-63	0.73	XP_016968802.1
	Select seq ref|XP_015040571.1|	uncharacterized protein Dpse_GA20994, isoform C [Drosophila pseudoobscura pseudoobscura]	198	198	0.81	2e-62	0.68	XP_015040571.1
	Select seq ref|XP_016929117.1|	PREDICTED: receptor expression-enhancing protein 5 isoform X2 [Drosophila suzukii]	196	196	0.74	7e-62	0.71	XP_016929117.1
	Select seq ref|XP_015034214.1|	uncharacterized protein Dwil_GK21552, isoform B [Drosophila willistoni]	196	196	0.75	9e-62	0.7	XP_015034214.1
	Select seq ref|XP_017087906.1|	PREDICTED: receptor expression-enhancing protein 5 isoform X2 [Drosophila bipectinata]	196	196	0.8	1e-61	0.65	XP_017087906.1
	Select seq ref|XP_015011652.1|	uncharacterized protein Dere_GG20429, isoform C [Drosophila erecta]	195	195	0.75	2e-61	0.68	XP_015011652.1
	Select seq ref|XP_015029099.1|	uncharacterized protein Dvir_GJ20059, isoform C [Drosophila virilis]	195	195	0.81	3e-61	0.65	XP_015029099.1
	Select seq ref|XP_015034215.1|	uncharacterized protein Dwil_GK21552, isoform C [Drosophila willistoni]	193	193	0.74	1e-60	0.7	XP_015034215.1
	Select seq ref|XP_017049596.1|	PREDICTED: receptor expression-enhancing protein 5 isoform X3 [Drosophila ficusphila]	193	193	0.75	1e-60	0.68	XP_017049596.1
	Select seq ref|XP_015011651.1|	uncharacterized protein Dere_GG20429, isoform B [Drosophila erecta]	193	193	0.75	2e-60	0.68	XP_015011651.1
	Select seq ref|XP_971918.2|	PREDICTED: receptor expression-enhancing protein 5 [Tribolium castaneum]	192	192	0.96	6e-60	0.5	XP_971918.2
	Select seq ref|XP_015029098.1|	uncharacterized protein Dvir_GJ20059, isoform B [Drosophila virilis]	191	191	0.71	1e-59	0.71	XP_015029098.1
	Select seq ref|XP_017049595.1|	PREDICTED: receptor expression-enhancing protein 5 isoform X2 [Drosophila ficusphila]	191	191	0.75	1e-59	0.69	XP_017049595.1
	Select seq ref|XP_001653851.1|	AAEL009604-PB [Aedes aegypti]	190	190	0.95	6e-59	0.51	XP_001653851.1
	Select seq ref|XP_001653849.1|	AAEL009604-PA [Aedes aegypti]	187	187	0.9	4e-58	0.53	XP_001653849.1
	Select seq ref|XP_013195128.1|	PREDICTED: receptor expression-enhancing protein 5 isoform X1 [Amyelois transitella]	187	187	0.91	8e-58	0.5	XP_013195128.1
	Select seq ref|XP_015019214.1|	uncharacterized protein Dmoj_GI19086, isoform B [Drosophila mojavensis]	186	186	0.81	1e-57	0.63	XP_015019214.1
	Select seq ref|XP_317989.3|	AGAP004819-PC [Anopheles gambiae str. PEST]	186	186	0.94	2e-57	0.52	XP_317989.3
	Select seq ref|XP_013113797.1|	PREDICTED: receptor expression-enhancing protein 5 isoform X1 [Stomoxys calcitrans]	185	185	0.72	2e-57	0.65	XP_013113797.1
	Select seq ref|XP_013195130.1|	PREDICTED: receptor expression-enhancing protein 5 isoform X3 [Amyelois transitella]	185	185	0.91	3e-57	0.51	XP_013195130.1
	Select seq ref|XP_013195129.1|	PREDICTED: receptor expression-enhancing protein 5 isoform X2 [Amyelois transitella]	185	185	0.9	3e-57	0.49	XP_013195129.1
	Select seq ref|XP_011209722.1|	PREDICTED: receptor expression-enhancing protein 5 isoform X3 [Bactrocera dorsalis]	184	184	0.75	4e-57	0.64	XP_011209722.1
	Select seq ref|XP_004534911.1|	PREDICTED: receptor expression-enhancing protein 5 isoform X3 [Ceratitis capitata]	184	184	0.75	6e-57	0.63	XP_004534911.1
	Select seq ref|XP_005174827.1|	PREDICTED: receptor expression-enhancing protein 5 isoform X2 [Musca domestica]	184	184	0.72	8e-57	0.65	XP_005174827.1
	Select seq ref|XP_011196534.1|	PREDICTED: receptor expression-enhancing protein 5 isoform X4 [Bactrocera cucurbitae]	183	183	0.73	1e-56	0.66	XP_011196534.1
	Select seq ref|XP_011196532.1|	PREDICTED: receptor expression-enhancing protein 5 isoform X3 [Bactrocera cucurbitae]	183	183	0.75	1e-56	0.63	XP_011196532.1
	Select seq ref|XP_012553144.1|	PREDICTED: receptor expression enhancing protein isoform X1 [Bombyx mori]	183	183	0.91	3e-56	0.49	XP_012553144.1
	Select seq ref|XP_014371444.1|	PREDICTED: receptor expression-enhancing protein 5-like isoform X3 [Papilio machaon]	182	182	0.91	5e-56	0.5	XP_014371444.1
	Select seq ref|XP_014101171.1|	PREDICTED: receptor expression-enhancing protein 5 isoform X3 [Bactrocera oleae]	181	181	0.75	6e-56	0.64	XP_014101171.1
	Select seq ref|XP_011554780.1|	PREDICTED: receptor expression-enhancing protein 6-like isoform X2 [Plutella xylostella]	182	182	0.98	7e-56	0.47	XP_011554780.1
	Select seq ref|XP_011554778.1|	PREDICTED: receptor expression-enhancing protein 6-like isoform X1 [Plutella xylostella]	182	182	0.98	1e-55	0.47	XP_011554778.1
	Select seq ref|NP_001299640.1|	receptor expression-enhancing protein 5 [Papilio xuthus]	181	181	0.91	1e-55	0.49	NP_001299640.1
	Select seq ref|XP_013113799.1|	PREDICTED: receptor expression-enhancing protein 5 isoform X2 [Stomoxys calcitrans]	181	181	0.65	1e-55	0.69	XP_013113799.1
	Select seq ref|XP_013147907.1|	PREDICTED: receptor expression-enhancing protein 5-like isoform X3 [Papilio polytes]	181	181	0.91	1e-55	0.48	XP_013147907.1
	Select seq ref|XP_013147904.1|	PREDICTED: receptor expression-enhancing protein 5-like isoform X1 [Papilio polytes]	182	182	0.9	1e-55	0.49	XP_013147904.1
	Select seq ref|XP_014371443.1|	PREDICTED: receptor expression-enhancing protein 5-like isoform X2 [Papilio machaon]	181	181	0.9	1e-55	0.49	XP_014371443.1
	Select seq ref|NP_001040329.1|	receptor expression enhancing protein isoform 2 [Bombyx mori]	180	180	0.91	2e-55	0.49	NP_001040329.1
	Select seq ref|XP_011554781.1|	PREDICTED: receptor expression-enhancing protein 6-like isoform X3 [Plutella xylostella]	180	180	0.95	2e-55	0.48	XP_011554781.1
	Select seq ref|XP_004534910.1|	PREDICTED: receptor expression-enhancing protein 5 isoform X2 [Ceratitis capitata]	180	180	0.68	3e-55	0.69	XP_004534910.1
	Select seq ref|XP_014371442.1|	PREDICTED: receptor expression-enhancing protein 5-like isoform X1 [Papilio machaon]	181	181	0.87	3e-55	0.51	XP_014371442.1
	Select seq ref|XP_013164093.1|	PREDICTED: receptor expression-enhancing protein 5 isoform X2 [Papilio xuthus]	180	180	0.9	3e-55	0.49	XP_013164093.1
	Select seq ref|XP_013164095.1|	PREDICTED: receptor expression-enhancing protein 5 isoform X4 [Papilio xuthus]	179	179	0.87	4e-55	0.5	XP_013164095.1
	Select seq ref|XP_013147906.1|	PREDICTED: receptor expression-enhancing protein 5-like isoform X2 [Papilio polytes]	180	180	0.9	4e-55	0.48	XP_013147906.1
	Select seq ref|XP_013164092.1|	PREDICTED: receptor expression-enhancing protein 5 isoform X1 [Papilio xuthus]	180	180	0.87	4e-55	0.5	XP_013164092.1
	Select seq ref|XP_011209721.1|	PREDICTED: receptor expression-enhancing protein 5 isoform X2 [Bactrocera dorsalis]	179	179	0.68	6e-55	0.69	XP_011209721.1
	Select seq ref|XP_014101112.1|	PREDICTED: receptor expression-enhancing protein 5 isoform X2 [Bactrocera oleae]	179	179	0.68	8e-55	0.69	XP_014101112.1
	Select seq ref|XP_011196531.1|	PREDICTED: receptor expression-enhancing protein 5 isoform X2 [Bactrocera cucurbitae]	179	179	0.66	8e-55	0.7	XP_011196531.1
	Select seq ref|NP_001103774.1|	receptor expression enhancing protein isoform 1 [Bombyx mori]	175	175	0.87	2e-53	0.5	NP_001103774.1
	Select seq ref|XP_014480529.1|	PREDICTED: receptor expression-enhancing protein 5-like [Dinoponera quadriceps]	176	176	0.85	3e-53	0.52	XP_014480529.1

## Sheet: CG5539_PB
Blastp results for CG5539- PB
	Sequences producing significant alignments:
	Select:AllNone Selected:0
	AlignmentsDownloadGenPeptGraphicsDistance tree of resultsMultiple alignmentShow/hide columns of the table presenting sequences producing significant alignments
	Sequences producing significant alignments:
	Select for downloading or viewing reports	Description	Max score	Total score	Query cover	E value	Ident	Accession
	Select seq ref|NP_611831.2|	CG5539, isoform A [Drosophila melanogaster]	604	604	1	0	1	NP_611831.2
	Select seq ref|XP_002040143.1|	GM16047 [Drosophila sechellia]	556	556	1	0	0.91	XP_002040143.1
	Select seq ref|XP_002082846.2|	uncharacterized protein Dsimw501_GD11797 [Drosophila simulans]	538	538	1	0	0.89	XP_002082846.2
	Select seq ref|XP_001976464.2|	LOW QUALITY PROTEIN: uncharacterized protein Dere_GG22887 [Drosophila erecta]	470	470	1	1e-165	0.75	XP_001976464.2
	Select seq ref|XP_002092680.2|	LOW QUALITY PROTEIN: uncharacterized protein Dyak_GE14325 [Drosophila yakuba]	456	456	1	2e-159	0.75	XP_002092680.2
	Select seq ref|XP_016953520.1|	PREDICTED: receptor expression-enhancing protein 1 [Drosophila biarmipes]	384	384	0.95	1e-131	0.64	XP_016953520.1
	Select seq ref|XP_017002985.1|	PREDICTED: receptor expression-enhancing protein 1 [Drosophila takahashii]	381	381	0.95	2e-130	0.65	XP_017002985.1
	Select seq ref|XP_016930369.1|	PREDICTED: receptor expression-enhancing protein 1 [Drosophila suzukii]	365	365	0.95	4e-124	0.63	XP_016930369.1
	Select seq ref|XP_016973902.1|	PREDICTED: receptor expression-enhancing protein 2 [Drosophila rhopaloa]	347	347	0.95	7e-117	0.61	XP_016973902.1
	Select seq ref|XP_017070123.1|	PREDICTED: uncharacterized protein LOC108107217 [Drosophila eugracilis]	335	335	0.95	3e-112	0.58	XP_017070123.1
	Select seq ref|XP_017045438.1|	PREDICTED: receptor expression-enhancing protein 2 [Drosophila ficusphila]	318	318	0.97	2e-105	0.59	XP_017045438.1
	Select seq ref|XP_017120400.1|	PREDICTED: putative HVA22-like protein g [Drosophila elegans]	303	303	0.93	7e-100	0.57	XP_017120400.1
	Select seq ref|XP_001958651.1|	uncharacterized protein Dana_GF12506 [Drosophila ananassae]	301	301	0.96	3e-99	0.54	XP_001958651.1
	Select seq ref|XP_017106234.1|	PREDICTED: receptor expression-enhancing protein 2 [Drosophila bipectinata]	282	282	0.96	9e-92	0.5	XP_017106234.1
	Select seq ref|XP_017027683.1|	PREDICTED: putative HVA22-like protein g [Drosophila kikkawai]	252	252	0.96	9e-80	0.43	XP_017027683.1
	Select seq ref|XP_002015417.1|	GL11033 [Drosophila persimilis]	170	170	0.95	5e-48	0.36	XP_002015417.1
	Select seq ref|XP_017148663.1|	PREDICTED: receptor expression-enhancing protein 2 [Drosophila miranda]	171	171	0.98	6e-48	0.36	XP_017148663.1
	Select seq ref|XP_001357532.3|	uncharacterized protein Dpse_GA18956 [Drosophila pseudoobscura pseudoobscura]	167	167	0.95	7e-47	0.35	XP_001357532.3
	Select seq ref|XP_002066136.1|	uncharacterized protein Dwil_GK22196 [Drosophila willistoni]	162	162	0.92	1e-44	0.34	XP_002066136.1
	Select seq ref|XP_002006077.1|	uncharacterized protein Dmoj_GI20834 [Drosophila mojavensis]	160	160	0.59	3e-44	0.43	XP_002006077.1
	Select seq ref|XP_001986053.1|	GH20750 [Drosophila grimshawi]	157	157	0.95	2e-43	0.32	XP_001986053.1
	Select seq ref|XP_002049755.1|	uncharacterized protein Dvir_GJ21765 [Drosophila virilis]	136	136	0.5	2e-36	0.44	XP_002049755.1
	Select seq ref|XP_012154863.1|	PREDICTED: receptor expression-enhancing protein 2 isoform X7 [Ceratitis capitata]	104	104	0.75	1e-22	0.26	XP_012154863.1
	Select seq ref|XP_012560239.1|	PREDICTED: receptor expression-enhancing protein 1-like [Hydra vulgaris]	103	103	0.36	3e-22	0.37	XP_012560239.1
	Select seq ref|XP_011204248.1|	PREDICTED: uncharacterized protein LOC105226849 isoform X2 [Bactrocera dorsalis]	103	103	0.36	2e-21	0.35	XP_011204248.1
	Select seq ref|XP_012154867.1|	PREDICTED: receptor expression-enhancing protein 1 isoform X8 [Ceratitis capitata]	99.4	99.4	0.36	6e-21	0.34	XP_012154867.1
	Select seq ref|XP_011179570.1|	PREDICTED: uncharacterized protein LOC105210370 [Bactrocera cucurbitae]	101	101	0.36	1e-20	0.35	XP_011179570.1
	Select seq ref|XP_002062728.1|	uncharacterized protein Dwil_GK19544, isoform A [Drosophila willistoni]	97.4	97.4	0.44	2e-20	0.31	XP_002062728.1
	Select seq ref|XP_011296438.1|	PREDICTED: LOW QUALITY PROTEIN: receptor expression-enhancing protein 3-B [Musca domestica]	97.8	97.8	0.36	2e-20	0.35	XP_011296438.1
	Select seq ref|XP_002049417.1|	uncharacterized protein Dvir_GJ21570, isoform A [Drosophila virilis]	97.1	97.1	0.52	3e-20	0.3	XP_002049417.1
	Select seq ref|XP_004517649.1|	PREDICTED: uncharacterized protein LOC101453424 isoform X2 [Ceratitis capitata]	99.8	99.8	0.36	4e-20	0.34	XP_004517649.1
	Select seq ref|XP_002006870.1|	uncharacterized protein Dmoj_GI21304, isoform A [Drosophila mojavensis]	96.7	96.7	0.44	4e-20	0.3	XP_002006870.1
	Select seq ref|XP_015020094.1|	uncharacterized protein Dmoj_GI21304, isoform D [Drosophila mojavensis]	97.1	97.1	0.36	5e-20	0.33	XP_015020094.1
	Select seq ref|XP_016029175.1|	uncharacterized protein Dsimw501_GD11726, isoform M [Drosophila simulans]	96.3	96.3	0.92	6e-20	0.25	XP_016029175.1
	Select seq ref|XP_012154850.1|	PREDICTED: uncharacterized protein LOC101453424 isoform X4 [Ceratitis capitata]	99	99	0.71	6e-20	0.26	XP_012154850.1
	Select seq ref|XP_015029763.1|	uncharacterized protein Dvir_GJ21570, isoform E [Drosophila virilis]	97.1	97.1	0.36	7e-20	0.33	XP_015029763.1
	Select seq ref|XP_001657913.1|	AAEL006632-PC [Aedes aegypti]	95.9	95.9	0.36	1e-19	0.33	XP_001657913.1
	Select seq ref|XP_015034454.1|	uncharacterized protein Dwil_GK19544, isoform D [Drosophila willistoni]	98.6	98.6	0.36	1e-19	0.34	XP_015034454.1
	Select seq ref|XP_002039999.1|	GM15973 [Drosophila sechellia]	95.5	95.5	0.66	1e-19	0.28	XP_002039999.1
	Select seq ref|XP_015029760.1|	uncharacterized protein Dvir_GJ21570, isoform B [Drosophila virilis]	97.8	97.8	0.36	2e-19	0.33	XP_015029760.1
	Select seq ref|XP_015020093.1|	uncharacterized protein Dmoj_GI21304, isoform C [Drosophila mojavensis]	97.8	97.8	0.36	2e-19	0.33	XP_015020093.1
	Select seq ref|XP_013117781.1|	PREDICTED: receptor expression-enhancing protein 2-like isoform X1 [Stomoxys calcitrans]	97.1	97.1	0.69	2e-19	0.25	XP_013117781.1
	Select seq ref|XP_015020092.1|	uncharacterized protein Dmoj_GI21304, isoform B [Drosophila mojavensis]	97.4	97.4	0.36	2e-19	0.33	XP_015020092.1
	Select seq ref|XP_011558226.1|	PREDICTED: receptor expression-enhancing protein 1 isoform X5 [Plutella xylostella]	95.1	95.1	0.36	2e-19	0.33	XP_011558226.1
	Select seq ref|XP_013133223.1|	PREDICTED: receptor expression-enhancing protein 1 isoform X1 [Papilio polytes]	95.1	95.1	0.36	3e-19	0.33	XP_013133223.1
	Select seq ref|XP_014369583.1|	PREDICTED: receptor expression-enhancing protein 1 isoform X2 [Papilio machaon]	94.7	94.7	0.36	3e-19	0.33	XP_014369583.1
	Select seq ref|XP_011558218.1|	PREDICTED: receptor expression-enhancing protein 1 isoform X4 [Plutella xylostella]	94.7	94.7	0.36	3e-19	0.33	XP_011558218.1
	Select seq ref|XP_011558211.1|	PREDICTED: receptor expression-enhancing protein 1 isoform X3 [Plutella xylostella]	94.4	94.4	0.36	4e-19	0.33	XP_011558211.1
	Select seq ref|XP_015838013.1|	PREDICTED: receptor expression-enhancing protein 1 isoform X4 [Tribolium castaneum]	94	94	0.36	4e-19	0.33	XP_015838013.1
	Select seq ref|XP_017132072.1|	PREDICTED: receptor expression-enhancing protein 1 isoform X11 [Drosophila elegans]	94.7	94.7	0.36	4e-19	0.34	XP_017132072.1
	Select seq ref|XP_017146566.1|	PREDICTED: receptor expression-enhancing protein 1 isoform X10 [Drosophila miranda]	94.7	94.7	0.36	4e-19	0.33	XP_017146566.1
	Select seq ref|XP_016998769.1|	PREDICTED: receptor expression-enhancing protein 2 isoform X12 [Drosophila takahashii]	94.4	94.4	0.36	4e-19	0.34	XP_016998769.1
	Select seq ref|XP_017078779.1|	PREDICTED: receptor expression-enhancing protein 1 isoform X9 [Drosophila eugracilis]	94.4	94.4	0.36	5e-19	0.34	XP_017078779.1
	Select seq ref|NP_001286751.1|	REEP1 homolog, isoform S [Drosophila melanogaster]	94.4	94.4	0.36	5e-19	0.34	NP_001286751.1
	Select seq ref|XP_015200460.1|	PREDICTED: receptor expression-enhancing protein 1 isoform X4 [Lepisosteus oculatus]	94	94	0.36	5e-19	0.33	XP_015200460.1
	Select seq ref|XP_014780357.1|	PREDICTED: receptor expression-enhancing protein 1-like isoform X5 [Octopus bimaculoides]	92.8	92.8	0.72	5e-19	0.26	XP_014780357.1
	Select seq ref|XP_013114067.1|	PREDICTED: receptor expression-enhancing protein 4-like [Stomoxys calcitrans]	95.9	95.9	0.43	6e-19	0.3	XP_013114067.1
	Select seq ref|XP_015838006.1|	PREDICTED: receptor expression-enhancing protein 1 isoform X3 [Tribolium castaneum]	94	94	0.36	6e-19	0.33	XP_015838006.1
	Select seq ref|XP_016929788.1|	PREDICTED: receptor expression-enhancing protein 1 isoform X11 [Drosophila suzukii]	94	94	0.36	6e-19	0.34	XP_016929788.1
	Select seq ref|XP_017053995.1|	PREDICTED: receptor expression-enhancing protein 1 isoform X12 [Drosophila ficusphila]	94	94	0.36	6e-19	0.34	XP_017053995.1
	Select seq ref|XP_016947394.1|	PREDICTED: receptor expression-enhancing protein 1 isoform X10 [Drosophila biarmipes]	94	94	0.36	6e-19	0.34	XP_016947394.1
	Select seq ref|XP_001985740.1|	GH20967 [Drosophila grimshawi]	93.6	93.6	0.45	7e-19	0.29	XP_001985740.1
	Select seq ref|XP_012944854.1|	PREDICTED: uncharacterized protein LOC101860471 [Aplysia californica]	96.3	96.3	0.52	7e-19	0.3	XP_012944854.1
	Select seq ref|XP_016980833.1|	PREDICTED: receptor expression-enhancing protein 1 isoform X11 [Drosophila rhopaloa]	94	94	0.36	7e-19	0.34	XP_016980833.1
	Select seq ref|XP_001340207.3|	PREDICTED: receptor expression-enhancing protein 1-like [Danio rerio]	91.3	91.3	0.36	8e-19	0.33	XP_001340207.3
	Select seq ref|XP_017053997.1|	PREDICTED: uncharacterized protein T19C3.4 isoform X14 [Drosophila ficusphila]	93.2	93.2	0.36	8e-19	0.34	XP_017053997.1
	Select seq ref|XP_016361604.1|	PREDICTED: receptor expression-enhancing protein 1-like isoform X2 [Sinocyclocheilus anshuiensis]	91.3	91.3	0.36	9e-19	0.33	XP_016361604.1
	Select seq ref|XP_007889539.1|	PREDICTED: receptor expression-enhancing protein 2 isoform X2 [Callorhinchus milii]	92.8	92.8	0.78	9e-19	0.25	XP_007889539.1
	Select seq ref|XP_016101644.1|	PREDICTED: receptor expression-enhancing protein 1-like isoform X2 [Sinocyclocheilus grahami]	91.3	91.3	0.36	9e-19	0.33	XP_016101644.1
	Select seq ref|XP_014780356.1|	PREDICTED: receptor expression-enhancing protein 1-like isoform X4 [Octopus bimaculoides]	93.2	93.2	0.72	9e-19	0.26	XP_014780356.1
	Select seq ref|XP_967233.2|	PREDICTED: receptor expression-enhancing protein 4 isoform X1 [Tribolium castaneum]	95.1	95.1	0.36	9e-19	0.33	XP_967233.2
	Select seq ref|XP_010877154.1|	PREDICTED: receptor expression-enhancing protein 1 [Esox lucius]	93.6	93.6	0.36	9e-19	0.33	XP_010877154.1
	Select seq ref|XP_016398688.1|	PREDICTED: receptor expression-enhancing protein 1-like isoform X2 [Sinocyclocheilus rhinocerous]	91.3	91.3	0.36	1e-18	0.33	XP_016398688.1
	Select seq ref|XP_016947396.1|	PREDICTED: receptor expression-enhancing protein 2 isoform X12 [Drosophila biarmipes]	93.2	93.2	0.66	1e-18	0.28	XP_016947396.1
	Select seq ref|XP_016998771.1|	PREDICTED: receptor expression-enhancing protein 2 isoform X14 [Drosophila takahashii]	92.8	92.8	0.36	1e-18	0.34	XP_016998771.1
	Select seq ref|XP_016382317.1|	PREDICTED: receptor expression-enhancing protein 1-like isoform X2 [Sinocyclocheilus rhinocerous]	90.9	90.9	0.36	1e-18	0.33	XP_016382317.1
	Select seq ref|XP_015200457.1|	PREDICTED: receptor expression-enhancing protein 1 isoform X1 [Lepisosteus oculatus]	93.2	93.2	0.36	1e-18	0.33	XP_015200457.1
	Select seq ref|XP_016929790.1|	PREDICTED: receptor expression-enhancing protein 2 isoform X13 [Drosophila suzukii]	92.8	92.8	0.36	1e-18	0.34	XP_016929790.1
	Select seq ref|XP_014780355.1|	PREDICTED: receptor expression-enhancing protein 1-like isoform X3 [Octopus bimaculoides]	93.2	93.2	0.72	1e-18	0.26	XP_014780355.1
	Select seq ref|XP_015200459.1|	PREDICTED: receptor expression-enhancing protein 1 isoform X3 [Lepisosteus oculatus]	92.8	92.8	0.36	1e-18	0.33	XP_015200459.1
	Select seq ref|XP_017090905.1|	PREDICTED: receptor expression-enhancing protein 1 isoform X7 [Drosophila bipectinata]	93.2	93.2	0.36	1e-18	0.34	XP_017090905.1
	Select seq ref|XP_017078781.1|	PREDICTED: receptor expression-enhancing protein 2 isoform X11 [Drosophila eugracilis]	92.8	92.8	0.36	1e-18	0.34	XP_017078781.1
	Select seq ref|XP_017132074.1|	PREDICTED: receptor expression-enhancing protein 2 isoform X13 [Drosophila elegans]	92.8	92.8	0.36	1e-18	0.34	XP_017132074.1
	Select seq ref|XP_015200458.1|	PREDICTED: receptor expression-enhancing protein 1 isoform X2 [Lepisosteus oculatus]	93.2	93.2	0.36	1e-18	0.33	XP_015200458.1
	Select seq ref|XP_015838000.1|	PREDICTED: receptor expression-enhancing protein 1 isoform X2 [Tribolium castaneum]	94	94	0.36	1e-18	0.33	XP_015838000.1
	Select seq ref|XP_016980835.1|	PREDICTED: receptor expression-enhancing protein 2 isoform X13 [Drosophila rhopaloa]	92.4	92.4	0.36	1e-18	0.34	XP_016980835.1
	Select seq ref|XP_011204247.1|	PREDICTED: uncharacterized protein LOC105226849 isoform X1 [Bactrocera dorsalis]	95.5	95.5	0.33	2e-18	0.36	XP_011204247.1
	Select seq ref|XP_013117785.1|	PREDICTED: uncharacterized protein LOC106095087 isoform X5 [Stomoxys calcitrans]	94	94	0.43	2e-18	0.3	XP_013117785.1
	Select seq ref|XP_013117782.1|	PREDICTED: uncharacterized protein LOC106095087 isoform X2 [Stomoxys calcitrans]	94.4	94.4	0.43	2e-18	0.3	XP_013117782.1
	Select seq ref|XP_013117786.1|	PREDICTED: uncharacterized protein LOC106095087 isoform X6 [Stomoxys calcitrans]	94	94	0.43	2e-18	0.3	XP_013117786.1
	Select seq ref|XP_013117784.1|	PREDICTED: uncharacterized protein LOC106095087 isoform X4 [Stomoxys calcitrans]	94	94	0.43	2e-18	0.3	XP_013117784.1
	Select seq ref|XP_017038452.1|	PREDICTED: uncharacterized protein T19C3.4 isoform X11 [Drosophila kikkawai]	93.2	93.2	0.36	2e-18	0.33	XP_017038452.1
	Select seq ref|XP_013117787.1|	PREDICTED: uncharacterized protein LOC106095087 isoform X7 [Stomoxys calcitrans]	94	94	0.43	2e-18	0.3	XP_013117787.1
	Select seq ref|XP_013117788.1|	PREDICTED: uncharacterized protein LOC106095087 isoform X8 [Stomoxys calcitrans]	94	94	0.43	2e-18	0.3	XP_013117788.1
	Select seq ref|NP_726269.1|	REEP1 homolog, isoform E [Drosophila melanogaster]	92.4	92.4	0.85	2e-18	0.25	NP_726269.1
	Select seq ref|XP_017146568.1|	PREDICTED: receptor expression-enhancing protein 1 isoform X12 [Drosophila miranda]	92	92	0.5	2e-18	0.29	XP_017146568.1
	Select seq ref|XP_001976321.1|	uncharacterized protein Dere_GG22816, isoform A [Drosophila erecta]	92.4	92.4	0.36	2e-18	0.34	XP_001976321.1
	Select seq ref|XP_016382312.1|	PREDICTED: receptor expression-enhancing protein 1-like isoform X1 [Sinocyclocheilus rhinocerous]	92.8	92.8	0.36	2e-18	0.33	XP_016382312.1
	Select seq ref|XP_016382364.1|	PREDICTED: receptor expression-enhancing protein 1-like [Sinocyclocheilus rhinocerous]	89.7	89.7	0.36	2e-18	0.33	XP_016382364.1
	Select seq ref|NP_001188990.2|	REEP1 homolog, isoform P [Drosophila melanogaster]	94.7	94.7	0.36	2e-18	0.34	NP_001188990.2

## Sheet: CG11697_PA
Blastp results for CG11697- PA
	Sequences producing significant alignments:
	Select:AllNone Selected:0
	AlignmentsDownloadGenPeptGraphicsDistance tree of resultsMultiple alignmentShow/hide columns of the table presenting sequences producing significant alignments
	Sequences producing significant alignments:
	Select for downloading or viewing reports	Description	Max score	Total score	Query cover	E value	Ident	Accession
	Select seq ref|NP_572730.1|	uncharacterized protein Dmel_CG11697, isoform A [Drosophila melanogaster]	491	491	1	3e-176	1	NP_572730.1
	Select seq ref|NP_001259452.1|	uncharacterized protein Dmel_CG11697, isoform B [Drosophila melanogaster]	443	443	1	2e-157	0.93	NP_001259452.1
	Select seq ref|XP_002044091.1|	GM13092 [Drosophila sechellia]	421	421	0.98	2e-148	0.91	XP_002044091.1
	Select seq ref|XP_016038946.1|	uncharacterized protein Dsimw501_GD29448 [Drosophila simulans]	400	400	0.92	3e-140	0.91	XP_016038946.1
	Select seq ref|XP_001977106.1|	uncharacterized protein Dere_GG18428 [Drosophila erecta]	390	390	1	3e-136	0.8	XP_001977106.1
	Select seq ref|XP_002100849.1|	uncharacterized protein Dyak_GE15946 [Drosophila yakuba]	348	348	1	2e-119	0.76	XP_002100849.1
	Select seq ref|XP_016939384.1|	PREDICTED: receptor expression-enhancing protein 4 [Drosophila suzukii]	304	304	0.99	1e-101	0.63	XP_016939384.1
	Select seq ref|XP_016948769.1|	PREDICTED: receptor expression-enhancing protein 4 [Drosophila biarmipes]	303	303	0.99	3e-101	0.62	XP_016948769.1
	Select seq ref|XP_017085531.1|	PREDICTED: receptor expression-enhancing protein 2 isoform X1 [Drosophila eugracilis]	298	298	0.98	8e-100	0.65	XP_017085531.1
	Select seq ref|XP_016986886.1|	PREDICTED: uncharacterized protein T19C3.4 [Drosophila rhopaloa]	293	293	0.99	1e-97	0.63	XP_016986886.1
	Select seq ref|XP_017011110.1|	PREDICTED: receptor expression-enhancing protein 2 [Drosophila takahashii]	280	280	0.97	1e-92	0.63	XP_017011110.1
	Select seq ref|XP_017045614.1|	PREDICTED: uncharacterized protein T19C3.4 [Drosophila ficusphila]	271	271	0.96	6e-89	0.59	XP_017045614.1
	Select seq ref|XP_017085539.1|	PREDICTED: uncharacterized protein LOC108117537 isoform X2 [Drosophila eugracilis]	263	263	0.98	4e-86	0.6	XP_017085539.1
	Select seq ref|XP_017121545.1|	PREDICTED: uncharacterized protein T19C3.4 [Drosophila elegans]	241	241	0.99	4e-77	0.56	XP_017121545.1
	Select seq ref|XP_001963376.1|	uncharacterized protein Dana_GF20320 [Drosophila ananassae]	214	214	0.94	3e-66	0.48	XP_001963376.1
	Select seq ref|XP_017089684.1|	PREDICTED: LOW QUALITY PROTEIN: HVA22-like protein i [Drosophila bipectinata]	211	211	0.94	2e-65	0.47	XP_017089684.1
	Select seq ref|XP_017030415.1|	PREDICTED: uncharacterized protein LOC108080264 [Drosophila kikkawai]	138	138	0.87	1e-36	0.39	XP_017030415.1
	Select seq ref|XP_002011333.2|	uncharacterized protein Dmoj_GI16054 [Drosophila mojavensis]	89.4	89.4	0.67	1e-17	0.32	XP_002011333.2
	Select seq ref|XP_002058187.2|	uncharacterized protein Dvir_GJ15630 [Drosophila virilis]	88.2	88.2	0.7	2e-17	0.31	XP_002058187.2
	Select seq ref|XP_005176053.1|	PREDICTED: receptor expression-enhancing protein 1-like [Musca domestica]	79	79	0.4	4e-15	0.38	XP_005176053.1
	Select seq ref|XP_001657913.1|	AAEL006632-PC [Aedes aegypti]	78.6	78.6	0.39	5e-14	0.37	XP_001657913.1
	Select seq ref|XP_014220218.1|	PREDICTED: uncharacterized protein LOC106648067 isoform X2 [Trichogramma pretiosum]	79.3	79.3	0.5	1e-13	0.33	XP_014220218.1
	Select seq ref|XP_008211815.1|	PREDICTED: uncharacterized protein LOC100120566 [Nasonia vitripennis]	77.8	77.8	0.5	4e-13	0.32	XP_008211815.1
	Select seq ref|XP_014666527.1|	PREDICTED: receptor expression-enhancing protein 1-like isoform X2 [Priapulus caudatus]	76.3	76.3	0.39	4e-13	0.37	XP_014666527.1
	Select seq ref|XP_014666526.1|	PREDICTED: receptor expression-enhancing protein 1-like isoform X1 [Priapulus caudatus]	76.3	76.3	0.39	4e-13	0.37	XP_014666526.1
	Select seq ref|XP_014297479.1|	PREDICTED: acidic repeat-containing protein [Microplitis demolitor]	77.8	77.8	0.97	5e-13	0.27	XP_014297479.1
	Select seq ref|XP_012154867.1|	PREDICTED: receptor expression-enhancing protein 1 isoform X8 [Ceratitis capitata]	75.9	75.9	0.39	6e-13	0.36	XP_012154867.1
	Select seq ref|XP_013192845.1|	PREDICTED: uncharacterized protein LOC106136746 [Amyelois transitella]	77.4	77.4	0.41	6e-13	0.32	XP_013192845.1
	Select seq ref|XP_017146568.1|	PREDICTED: receptor expression-enhancing protein 1 isoform X12 [Drosophila miranda]	75.9	75.9	0.39	6e-13	0.34	XP_017146568.1
	Select seq ref|XP_017146566.1|	PREDICTED: receptor expression-enhancing protein 1 isoform X10 [Drosophila miranda]	76.3	76.3	0.39	6e-13	0.34	XP_017146566.1
	Select seq ref|XP_012154863.1|	PREDICTED: receptor expression-enhancing protein 2 isoform X7 [Ceratitis capitata]	75.9	75.9	0.39	7e-13	0.36	XP_012154863.1
	Select seq ref|XP_014220217.1|	PREDICTED: uncharacterized protein LOC106648067 isoform X1 [Trichogramma pretiosum]	77	77	0.5	7e-13	0.31	XP_014220217.1
	Select seq ref|XP_004444541.1|	uncharacterized protein Dpse_GA30269, isoform A [Drosophila pseudoobscura pseudoobscura]	77	77	0.39	7e-13	0.34	XP_004444541.1
	Select seq ref|XP_004444544.2|	uncharacterized protein Dpse_GA30269, isoform J [Drosophila pseudoobscura pseudoobscura]	77	77	0.39	8e-13	0.34	XP_004444544.2
	Select seq ref|XP_004517649.1|	PREDICTED: uncharacterized protein LOC101453424 isoform X2 [Ceratitis capitata]	77	77	0.39	8e-13	0.36	XP_004517649.1
	Select seq ref|XP_017146559.1|	PREDICTED: uncharacterized protein LOC108158605 isoform X4 [Drosophila miranda]	76.6	76.6	0.39	8e-13	0.34	XP_017146559.1
	Select seq ref|XP_017146561.1|	PREDICTED: uncharacterized protein LOC108158605 isoform X5 [Drosophila miranda]	76.6	76.6	0.39	8e-13	0.34	XP_017146561.1
	Select seq ref|XP_012267981.1|	PREDICTED: uncharacterized protein LOC105692965 isoform X4 [Athalia rosae]	77	77	0.46	9e-13	0.34	XP_012267981.1
	Select seq ref|XP_967233.2|	PREDICTED: receptor expression-enhancing protein 4 isoform X1 [Tribolium castaneum]	76.3	76.3	0.39	1e-12	0.34	XP_967233.2
	Select seq ref|XP_015838013.1|	PREDICTED: receptor expression-enhancing protein 1 isoform X4 [Tribolium castaneum]	75.1	75.1	0.39	1e-12	0.34	XP_015838013.1
	Select seq ref|XP_012551357.1|	PREDICTED: uncharacterized protein LOC101737270 isoform X1 [Bombyx mori]	76.3	76.3	0.41	1e-12	0.31	XP_012551357.1
	Select seq ref|XP_015520025.1|	PREDICTED: uncharacterized protein LOC107224473 isoform X4 [Neodiprion lecontei]	76.3	76.3	0.46	1e-12	0.34	XP_015520025.1
	Select seq ref|XP_011505679.1|	PREDICTED: uncharacterized protein LOC105368371 [Ceratosolen solmsi marchali]	76.3	76.3	0.46	1e-12	0.32	XP_011505679.1
	Select seq ref|XP_012220379.1|	PREDICTED: uncharacterized protein LOC105671082 isoform X1 [Linepithema humile]	75.9	75.9	0.46	2e-12	0.32	XP_012220379.1
	Select seq ref|XP_015838000.1|	PREDICTED: receptor expression-enhancing protein 1 isoform X2 [Tribolium castaneum]	75.1	75.1	0.39	2e-12	0.34	XP_015838000.1
	Select seq ref|XP_015838006.1|	PREDICTED: receptor expression-enhancing protein 1 isoform X3 [Tribolium castaneum]	74.7	74.7	0.39	2e-12	0.34	XP_015838006.1
	Select seq ref|XP_011558195.1|	PREDICTED: uncharacterized protein LOC105388865 isoform X1 [Plutella xylostella]	75.9	75.9	0.41	2e-12	0.31	XP_011558195.1
	Select seq ref|XP_015520022.1|	PREDICTED: uncharacterized protein LOC107224473 isoform X1 [Neodiprion lecontei]	75.9	75.9	0.45	2e-12	0.35	XP_015520022.1
	Select seq ref|XP_014369582.1|	PREDICTED: uncharacterized protein LOC106719699 isoform X1 [Papilio machaon]	75.5	75.5	0.41	2e-12	0.31	XP_014369582.1
	Select seq ref|XP_011872089.1|	PREDICTED: receptor expression-enhancing protein 2-like isoform X1 [Vollenhovia emeryi]	75.1	75.1	0.76	2e-12	0.25	XP_011872089.1
	Select seq ref|XP_002092531.1|	uncharacterized protein Dyak_GE14249, isoform A [Drosophila yakuba]	74.3	74.3	0.65	2e-12	0.28	XP_002092531.1
	Select seq ref|XP_012220385.1|	PREDICTED: uncharacterized protein LOC105671082 isoform X2 [Linepithema humile]	75.5	75.5	0.46	2e-12	0.32	XP_012220385.1
	Select seq ref|XP_013173372.1|	PREDICTED: uncharacterized protein LOC106122067 [Papilio xuthus]	75.5	75.5	0.41	2e-12	0.31	XP_013173372.1
	Select seq ref|XP_011558226.1|	PREDICTED: receptor expression-enhancing protein 1 isoform X5 [Plutella xylostella]	73.9	73.9	0.42	3e-12	0.31	XP_011558226.1
	Select seq ref|XP_015602894.1|	PREDICTED: uncharacterized protein LOC107271421 isoform X3 [Cephus cinctus]	75.5	75.5	0.46	3e-12	0.33	XP_015602894.1
	Select seq ref|XP_012551358.1|	PREDICTED: uncharacterized protein LOC101737270 isoform X2 [Bombyx mori]	75.1	75.1	0.41	3e-12	0.31	XP_012551358.1
	Select seq ref|XP_011558218.1|	PREDICTED: receptor expression-enhancing protein 1 isoform X4 [Plutella xylostella]	73.9	73.9	0.41	3e-12	0.31	XP_011558218.1
	Select seq ref|XP_014369583.1|	PREDICTED: receptor expression-enhancing protein 1 isoform X2 [Papilio machaon]	73.9	73.9	0.42	3e-12	0.31	XP_014369583.1
	Select seq ref|XP_013133223.1|	PREDICTED: receptor expression-enhancing protein 1 isoform X1 [Papilio polytes]	73.9	73.9	0.42	3e-12	0.31	XP_013133223.1
	Select seq ref|XP_013133224.1|	PREDICTED: uncharacterized protein LOC106099276 isoform X2 [Papilio polytes]	75.1	75.1	0.41	4e-12	0.31	XP_013133224.1
	Select seq ref|XP_002039999.1|	GM15973 [Drosophila sechellia]	73.6	73.6	0.64	4e-12	0.28	XP_002039999.1
	Select seq ref|XP_011558211.1|	PREDICTED: receptor expression-enhancing protein 1 isoform X3 [Plutella xylostella]	73.6	73.6	0.42	4e-12	0.31	XP_011558211.1
	Select seq ref|XP_012267976.1|	PREDICTED: uncharacterized protein LOC105692965 isoform X1 [Athalia rosae]	75.1	75.1	0.45	4e-12	0.34	XP_012267976.1
	Select seq ref|XP_012267980.1|	PREDICTED: uncharacterized protein LOC105692965 isoform X3 [Athalia rosae]	75.1	75.1	0.45	4e-12	0.34	XP_012267980.1
	Select seq ref|XP_012267978.1|	PREDICTED: uncharacterized protein LOC105692965 isoform X2 [Athalia rosae]	75.1	75.1	0.45	4e-12	0.34	XP_012267978.1
	Select seq ref|XP_012063138.1|	PREDICTED: uncharacterized protein LOC105626444 [Atta cephalotes]	75.1	75.1	0.46	4e-12	0.32	XP_012063138.1
	Select seq ref|XP_011340190.1|	PREDICTED: uncharacterized protein LOC105280991 isoform X1 [Cerapachys biroi]	75.1	75.1	0.46	4e-12	0.32	XP_011340190.1
	Select seq ref|XP_011068672.1|	PREDICTED: uncharacterized protein LOC105154691 isoform X1 [Acromyrmex echinatior]	75.1	75.1	0.46	4e-12	0.32	XP_011068672.1
	Select seq ref|XP_011693332.1|	PREDICTED: uncharacterized protein LOC105453244 isoform X1 [Wasmannia auropunctata]	75.1	75.1	0.46	4e-12	0.32	XP_011693332.1
	Select seq ref|XP_011641612.1|	PREDICTED: uncharacterized protein LOC105430009 isoform X2 [Pogonomyrmex barbatus]	75.1	75.1	0.46	4e-12	0.32	XP_011641612.1
	Select seq ref|XP_011641609.1|	PREDICTED: uncharacterized protein LOC105430009 isoform X1 [Pogonomyrmex barbatus]	75.1	75.1	0.46	4e-12	0.32	XP_011641609.1
	Select seq ref|XP_011159502.1|	PREDICTED: putative leucine-rich repeat-containing protein DDB_G0290503 isoform X1 [Solenopsis invicta]	75.1	75.1	0.46	4e-12	0.32	XP_011159502.1
	Select seq ref|XP_015112962.1|	PREDICTED: uncharacterized protein LOC107038395 [Diachasma alloeum]	74.7	74.7	0.98	4e-12	0.26	XP_015112962.1
	Select seq ref|XP_015794993.1|	PREDICTED: uncharacterized protein T19C3.4-like [Tetranychus urticae]	72.8	72.8	0.92	4e-12	0.23	XP_015794993.1
	Select seq ref|XP_011179570.1|	PREDICTED: uncharacterized protein LOC105210370 [Bactrocera cucurbitae]	74.7	74.7	0.39	5e-12	0.34	XP_011179570.1
	Select seq ref|XP_015921432.1|	PREDICTED: receptor expression-enhancing protein 1-like [Parasteatoda tepidariorum]	73.2	73.2	0.89	5e-12	0.27	XP_015921432.1
	Select seq ref|XP_012542254.1|	PREDICTED: uncharacterized protein LOC105840062 isoform X1 [Monomorium pharaonis]	74.7	74.7	0.46	5e-12	0.32	XP_012542254.1
	Select seq ref|XP_017038453.1|	PREDICTED: receptor expression-enhancing protein 2 isoform X12 [Drosophila kikkawai]	73.2	73.2	0.39	5e-12	0.33	XP_017038453.1
	Select seq ref|XP_011154012.1|	PREDICTED: uncharacterized protein LOC105191925 isoform X1 [Harpegnathos saltator]	74.7	74.7	0.46	6e-12	0.32	XP_011154012.1
	Select seq ref|XP_016029175.1|	uncharacterized protein Dsimw501_GD11726, isoform M [Drosophila simulans]	73.2	73.2	0.64	6e-12	0.28	XP_016029175.1
	Select seq ref|XP_015602892.1|	PREDICTED: uncharacterized protein LOC107271421 isoform X1 [Cephus cinctus]	74.7	74.7	0.45	6e-12	0.33	XP_015602892.1
	Select seq ref|XP_011872090.1|	PREDICTED: uncharacterized protein T19C3.4-like isoform X2 [Vollenhovia emeryi]	73.6	73.6	0.46	6e-12	0.32	XP_011872090.1
	Select seq ref|XP_012542255.1|	PREDICTED: uncharacterized protein LOC105840062 isoform X2 [Monomorium pharaonis]	74.3	74.3	0.46	6e-12	0.32	XP_012542255.1
	Select seq ref|XP_001985740.1|	GH20967 [Drosophila grimshawi]	72.8	72.8	0.39	7e-12	0.33	XP_001985740.1
	Select seq ref|XP_012287485.1|	PREDICTED: uncharacterized protein LOC105703570 [Orussus abietinus]	74.3	74.3	0.98	7e-12	0.26	XP_012287485.1
	Select seq ref|NP_726269.1|	REEP1 homolog, isoform E [Drosophila melanogaster]	72.8	72.8	0.64	8e-12	0.28	NP_726269.1
	Select seq ref|XP_014488871.1|	PREDICTED: uncharacterized protein LOC106752029 isoform X2 [Dinoponera quadriceps]	73.9	73.9	0.45	8e-12	0.32	XP_014488871.1
	Select seq ref|XP_014488864.1|	PREDICTED: uncharacterized protein LOC106752029 isoform X1 [Dinoponera quadriceps]	73.9	73.9	0.45	8e-12	0.32	XP_014488864.1
	Select seq ref|XP_014488872.1|	PREDICTED: uncharacterized protein LOC106752029 isoform X3 [Dinoponera quadriceps]	73.9	73.9	0.46	1e-11	0.32	XP_014488872.1
	Select seq ref|XP_011068676.1|	PREDICTED: uncharacterized protein LOC105154691 isoform X2 [Acromyrmex echinatior]	73.9	73.9	0.46	1e-11	0.32	XP_011068676.1
	Select seq ref|XP_011340193.1|	PREDICTED: uncharacterized protein LOC105280991 isoform X3 [Cerapachys biroi]	73.9	73.9	0.46	1e-11	0.32	XP_011340193.1
	Select seq ref|XP_011154013.1|	PREDICTED: uncharacterized protein LOC105191925 isoform X2 [Harpegnathos saltator]	73.9	73.9	0.46	1e-11	0.32	XP_011154013.1
	Select seq ref|XP_011693336.1|	PREDICTED: uncharacterized protein LOC105453244 isoform X2 [Wasmannia auropunctata]	73.9	73.9	0.46	1e-11	0.32	XP_011693336.1
	Select seq ref|XP_011641613.1|	PREDICTED: uncharacterized protein LOC105430009 isoform X3 [Pogonomyrmex barbatus]	73.9	73.9	0.46	1e-11	0.32	XP_011641613.1
	Select seq ref|XP_011159520.1|	PREDICTED: putative leucine-rich repeat-containing protein DDB_G0290503 isoform X2 [Solenopsis invicta]	73.9	73.9	0.46	1e-11	0.32	XP_011159520.1
	Select seq ref|XP_011264717.1|	PREDICTED: TNF receptor-associated factor family protein DDB_G0272098-like isoform X2 [Camponotus floridanus]	73.9	73.9	0.39	1e-11	0.34	XP_011264717.1
	Select seq ref|XP_011264712.1|	PREDICTED: TNF receptor-associated factor family protein DDB_G0272098-like isoform X1 [Camponotus floridanus]	73.9	73.9	0.39	1e-11	0.34	XP_011264712.1
	Select seq ref|XP_015034454.1|	uncharacterized protein Dwil_GK19544, isoform D [Drosophila willistoni]	73.6	73.6	0.39	1e-11	0.33	XP_015034454.1
	Select seq ref|XP_012542257.1|	PREDICTED: putative leucine-rich repeat-containing protein DDB_G0290503 isoform X3 [Monomorium pharaonis]	73.6	73.6	0.46	1e-11	0.32	XP_012542257.1
	Select seq ref|XP_011204248.1|	PREDICTED: uncharacterized protein LOC105226849 isoform X2 [Bactrocera dorsalis]	73.6	73.6	0.39	1e-11	0.34	XP_011204248.1

## Sheet: CG30177_PA
Blastp results for CG30177- PA
	Sequences producing significant alignments:
	Select:AllNone Selected:0
	AlignmentsDownloadGenPeptGraphicsDistance tree of resultsMultiple alignmentShow/hide columns of the table presenting sequences producing significant alignments
	Sequences producing significant alignments:
	Select for downloading or viewing reports	Description	Max score	Total score	Query cover	E value	Ident	Accession
	Select seq ref|NP_726366.1|	uncharacterized protein Dmel_CG30177 [Drosophila melanogaster]	428	428	1	3e-152	1	NP_726366.1
	Select seq ref|XP_002040141.1|	GM16046 [Drosophila sechellia]	357	357	1	4e-124	0.84	XP_002040141.1
	Select seq ref|XP_016029291.1|	uncharacterized protein Dsimw501_GD11796 [Drosophila simulans]	357	357	1	5e-124	0.83	XP_016029291.1
	Select seq ref|XP_001976462.1|	uncharacterized protein Dere_GG22886 [Drosophila erecta]	298	298	1	9e-101	0.71	XP_001976462.1
	Select seq ref|XP_002092678.1|	uncharacterized protein Dyak_GE14324 [Drosophila yakuba]	286	286	1	4e-96	0.68	XP_002092678.1
	Select seq ref|XP_017002995.1|	PREDICTED: uncharacterized protein LOC108061384 [Drosophila takahashii]	265	265	1	1e-87	0.6	XP_017002995.1
	Select seq ref|XP_016973905.1|	PREDICTED: uncharacterized protein LOC108040806 [Drosophila rhopaloa]	260	260	1	1e-85	0.58	XP_016973905.1
	Select seq ref|XP_016953011.1|	PREDICTED: uncharacterized protein LOC108026571 [Drosophila biarmipes]	256	256	1	4e-84	0.59	XP_016953011.1
	Select seq ref|XP_017120050.1|	PREDICTED: putative HVA22-like protein g [Drosophila elegans]	256	256	1	8e-84	0.59	XP_017120050.1
	Select seq ref|XP_016928199.1|	PREDICTED: uncharacterized protein LOC108008805 [Drosophila suzukii]	224	224	1	1e-71	0.56	XP_016928199.1
	Select seq ref|XP_017044929.1|	PREDICTED: receptor expression-enhancing protein 3-B [Drosophila ficusphila]	219	219	0.99	2e-69	0.55	XP_017044929.1
	Select seq ref|XP_017070134.1|	PREDICTED: uncharacterized protein LOC108107227 isoform X1 [Drosophila eugracilis]	213	213	1	4e-67	0.5	XP_017070134.1
	Select seq ref|XP_001958649.1|	uncharacterized protein Dana_GF12505 [Drosophila ananassae]	168	168	1	3e-49	0.39	XP_001958649.1
	Select seq ref|XP_017070135.1|	PREDICTED: receptor expression-enhancing protein 2 isoform X2 [Drosophila eugracilis]	119	119	0.39	4e-32	0.7	XP_017070135.1
	Select seq ref|XP_017105886.1|	PREDICTED: uncharacterized protein LOC108131498 [Drosophila bipectinata]	120	120	0.97	7e-31	0.34	XP_017105886.1
	Select seq ref|XP_017027095.1|	PREDICTED: uncharacterized protein LOC108078044 [Drosophila kikkawai]	96.7	96.7	0.75	2e-21	0.39	XP_017027095.1
	Select seq ref|XP_002066134.2|	uncharacterized protein Dwil_GK22094 [Drosophila willistoni]	72	72	1	3e-12	0.26	XP_002066134.2
	Select seq ref|XP_017045438.1|	PREDICTED: receptor expression-enhancing protein 2 [Drosophila ficusphila]	58.2	58.2	0.6	7e-07	0.29	XP_017045438.1
	Select seq ref|XP_001986053.1|	GH20750 [Drosophila grimshawi]	57.8	57.8	0.44	8e-07	0.31	XP_001986053.1
	Select seq ref|XP_016930369.1|	PREDICTED: receptor expression-enhancing protein 1 [Drosophila suzukii]	57.8	57.8	0.41	1e-06	0.31	XP_016930369.1
	Select seq ref|NP_611831.2|	CG5539, isoform A [Drosophila melanogaster]	57.4	57.4	0.4	1e-06	0.32	NP_611831.2
	Select seq ref|XP_017002985.1|	PREDICTED: receptor expression-enhancing protein 1 [Drosophila takahashii]	57.4	57.4	0.4	1e-06	0.32	XP_017002985.1
	Select seq ref|XP_002092680.2|	LOW QUALITY PROTEIN: uncharacterized protein Dyak_GE14325 [Drosophila yakuba]	56.6	56.6	0.47	2e-06	0.31	XP_002092680.2
	Select seq ref|XP_017120400.1|	PREDICTED: putative HVA22-like protein g [Drosophila elegans]	56.6	56.6	0.54	2e-06	0.31	XP_017120400.1
	Select seq ref|XP_002082846.2|	uncharacterized protein Dsimw501_GD11797 [Drosophila simulans]	56.2	56.2	0.47	2e-06	0.31	XP_002082846.2
	Select seq ref|XP_002040143.1|	GM16047 [Drosophila sechellia]	55.5	55.5	0.47	5e-06	0.3	XP_002040143.1
	Select seq ref|XP_001976464.2|	LOW QUALITY PROTEIN: uncharacterized protein Dere_GG22887 [Drosophila erecta]	55.8	55.8	0.48	5e-06	0.31	XP_001976464.2
	Select seq ref|XP_017070123.1|	PREDICTED: uncharacterized protein LOC108107217 [Drosophila eugracilis]	55.5	55.5	0.4	5e-06	0.31	XP_017070123.1
	Select seq ref|XP_016953520.1|	PREDICTED: receptor expression-enhancing protein 1 [Drosophila biarmipes]	55.1	55.1	0.41	8e-06	0.29	XP_016953520.1
	Select seq ref|XP_017027683.1|	PREDICTED: putative HVA22-like protein g [Drosophila kikkawai]	54.7	54.7	0.4	9e-06	0.3	XP_017027683.1
	Select seq ref|XP_016973902.1|	PREDICTED: receptor expression-enhancing protein 2 [Drosophila rhopaloa]	54.7	54.7	0.6	1e-05	0.29	XP_016973902.1
	Select seq ref|XP_001958651.1|	uncharacterized protein Dana_GF12506 [Drosophila ananassae]	54.3	54.3	0.41	2e-05	0.3	XP_001958651.1
	Select seq ref|XP_017106234.1|	PREDICTED: receptor expression-enhancing protein 2 [Drosophila bipectinata]	53.9	53.9	0.4	2e-05	0.31	XP_017106234.1
	Select seq ref|XP_002015417.1|	GL11033 [Drosophila persimilis]	52.4	52.4	0.39	6e-05	0.31	XP_002015417.1
	Select seq ref|XP_001357532.3|	uncharacterized protein Dpse_GA18956 [Drosophila pseudoobscura pseudoobscura]	52.4	52.4	0.39	6e-05	0.31	XP_001357532.3
	Select seq ref|XP_006588857.1|	PREDICTED: putative HVA22-like protein g [Glycine max]	52	52	0.4	8e-05	0.3	XP_006588857.1
	Select seq ref|XP_006679456.1|	hypothetical protein BATDEDRAFT_25456 [Batrachochytrium dendrobatidis JAM81]	51.2	51.2	0.39	0.0001	0.3	XP_006679456.1
	Select seq ref|XP_002066136.1|	uncharacterized protein Dwil_GK22196 [Drosophila willistoni]	51.2	51.2	0.41	0.0001	0.28	XP_002066136.1
	Select seq ref|XP_006575293.1|	PREDICTED: putative HVA22-like protein g [Glycine max]	50.1	50.1	0.4	0.0004	0.3	XP_006575293.1
	Select seq ref|XP_002006077.1|	uncharacterized protein Dmoj_GI20834 [Drosophila mojavensis]	49.3	49.3	0.55	0.0006	0.26	XP_002006077.1
	Select seq ref|XP_007145809.1|	hypothetical protein PHAVU_007G2697000g [Phaseolus vulgaris]	47.8	47.8	0.39	0.0009	0.27	XP_007145809.1
	Select seq ref|XP_009525162.1|	hypothetical protein PHYSODRAFT_492117 [Phytophthora sojae]	47.4	47.4	0.27	0.002	0.38	XP_009525162.1
	Select seq ref|XP_017148663.1|	PREDICTED: receptor expression-enhancing protein 2 [Drosophila miranda]	47.8	47.8	0.39	0.002	0.28	XP_017148663.1
	Select seq ref|XP_002899876.1|	conserved hypothetical protein [Phytophthora infestans T30-4]	46.6	46.6	0.27	0.003	0.38	XP_002899876.1
	Select seq ref|XP_004497678.1|	PREDICTED: putative HVA22-like protein g [Cicer arietinum]	47	47	0.4	0.004	0.28	XP_004497678.1
	Select seq ref|XP_008312381.1|	PREDICTED: receptor expression-enhancing protein 3 [Cynoglossus semilaevis]	46.6	46.6	0.36	0.005	0.3	XP_008312381.1
	Select seq ref|XP_011131030.1|	putative HVA22/TB2/DP1 family protein [Gregarina niphandrodes]	44.7	44.7	0.32	0.006	0.37	XP_011131030.1
	Select seq ref|XP_001632410.1|	predicted protein [Nematostella vectensis]	45.1	45.1	0.36	0.007	0.35	XP_001632410.1
	Select seq ref|XP_017407024.1|	PREDICTED: HVA22-like protein j [Vigna angularis]	44.7	44.7	0.39	0.01	0.29	XP_017407024.1
	Select seq ref|XP_014513209.1|	PREDICTED: HVA22-like protein j [Vigna radiata var. radiata]	44.7	44.7	0.39	0.011	0.29	XP_014513209.1
	Select seq ref|XP_015371316.1|	PREDICTED: receptor expression-enhancing protein 4-like [Diuraphis noxia]	45.4	45.4	0.61	0.012	0.25	XP_015371316.1
	Select seq ref|XP_014371442.1|	PREDICTED: receptor expression-enhancing protein 5-like isoform X1 [Papilio machaon]	44.3	44.3	0.34	0.019	0.32	XP_014371442.1
	Select seq ref|XP_013147904.1|	PREDICTED: receptor expression-enhancing protein 5-like isoform X1 [Papilio polytes]	44.3	44.3	0.34	0.019	0.32	XP_013147904.1
	Select seq ref|XP_013164092.1|	PREDICTED: receptor expression-enhancing protein 5 isoform X1 [Papilio xuthus]	44.3	44.3	0.34	0.02	0.32	XP_013164092.1
	Select seq ref|XP_014371443.1|	PREDICTED: receptor expression-enhancing protein 5-like isoform X2 [Papilio machaon]	43.9	43.9	0.34	0.025	0.32	XP_014371443.1
	Select seq ref|XP_012689685.1|	PREDICTED: receptor expression-enhancing protein 3-like isoform X1 [Clupea harengus]	44.7	44.7	0.36	0.026	0.3	XP_012689685.1
	Select seq ref|XP_013147906.1|	PREDICTED: receptor expression-enhancing protein 5-like isoform X2 [Papilio polytes]	43.5	43.5	0.34	0.028	0.32	XP_013147906.1
	Select seq ref|XP_014565146.1|	hypothetical protein L969DRAFT_19983 [Mixia osmundae IAM 14324]	43.5	43.5	0.36	0.028	0.29	XP_014565146.1
	Select seq ref|XP_014371444.1|	PREDICTED: receptor expression-enhancing protein 5-like isoform X3 [Papilio machaon]	43.5	43.5	0.34	0.029	0.32	XP_014371444.1
	Select seq ref|XP_013164093.1|	PREDICTED: receptor expression-enhancing protein 5 isoform X2 [Papilio xuthus]	43.5	43.5	0.34	0.029	0.32	XP_013164093.1
	Select seq ref|NP_001299640.1|	receptor expression-enhancing protein 5 [Papilio xuthus]	43.5	43.5	0.34	0.031	0.32	NP_001299640.1
	Select seq ref|XP_013147907.1|	PREDICTED: receptor expression-enhancing protein 5-like isoform X3 [Papilio polytes]	43.5	43.5	0.34	0.031	0.32	XP_013147907.1
	Select seq ref|XP_012553144.1|	PREDICTED: receptor expression enhancing protein isoform X1 [Bombyx mori]	43.9	43.9	0.33	0.031	0.29	XP_012553144.1
	Select seq ref|XP_011497835.1|	PREDICTED: receptor expression-enhancing protein 5-like [Ceratosolen solmsi marchali]	43.5	43.5	0.34	0.032	0.32	XP_011497835.1
	Select seq ref|XP_013164095.1|	PREDICTED: receptor expression-enhancing protein 5 isoform X4 [Papilio xuthus]	43.5	43.5	0.34	0.033	0.32	XP_013164095.1
	Select seq ref|XP_001950274.1|	PREDICTED: receptor expression-enhancing protein 4-like [Acyrthosiphon pisum]	43.9	43.9	0.39	0.035	0.28	XP_001950274.1
	Select seq ref|XP_004614991.1|	PREDICTED: receptor expression-enhancing protein 6 [Sorex araneus]	43.5	43.5	0.35	0.042	0.3	XP_004614991.1
	Select seq ref|XP_012480102.1|	PREDICTED: HVA22-like protein k [Gossypium raimondii]	43.1	43.1	0.85	0.045	0.24	XP_012480102.1
	Select seq ref|NP_001040329.1|	receptor expression enhancing protein isoform 2 [Bombyx mori]	42.7	42.7	0.33	0.048	0.29	NP_001040329.1
	Select seq ref|XP_012560239.1|	PREDICTED: receptor expression-enhancing protein 1-like [Hydra vulgaris]	43.9	43.9	0.35	0.049	0.25	XP_012560239.1
	Select seq ref|XP_013708552.1|	PREDICTED: putative HVA22-like protein g [Brassica napus]	43.1	43.1	0.41	0.049	0.24	XP_013708552.1
	Select seq ref|XP_015119490.1|	PREDICTED: receptor expression-enhancing protein 5-like [Diachasma alloeum]	42.4	42.4	0.34	0.081	0.28	XP_015119490.1
	Select seq ref|XP_001745178.1|	hypothetical protein [Monosiga brevicollis MX1]	42	42	0.27	0.081	0.34	XP_001745178.1
	Select seq ref|XP_015794993.1|	PREDICTED: uncharacterized protein T19C3.4-like [Tetranychus urticae]	42.7	42.7	0.33	0.081	0.31	XP_015794993.1
	Select seq ref|XP_003883236.1|	Receptor expression-enhancing protein 3, related [Neospora caninum Liverpool]	42.4	42.4	0.36	0.097	0.32	XP_003883236.1
	Select seq ref|XP_006682230.1|	hypothetical protein BATDEDRAFT_36094 [Batrachochytrium dendrobatidis JAM81]	42.7	42.7	0.3	0.098	0.32	XP_006682230.1
	Select seq ref|XP_013917171.1|	PREDICTED: receptor expression-enhancing protein 6-like [Thamnophis sirtalis]	41.6	41.6	0.34	0.099	0.38	XP_013917171.1
	Select seq ref|XP_004999330.1|	PREDICTED: receptor expression-enhancing protein 6 isoform X1 [Cavia porcellus]	42	42	0.3	0.13	0.34	XP_004999330.1
	Select seq ref|XP_013733629.1|	PREDICTED: HVA22-like protein k [Brassica napus]	41.6	41.6	0.4	0.16	0.28	XP_013733629.1
	Select seq ref|XP_016544867.1|	PREDICTED: putative HVA22-like protein g isoform X1 [Capsicum annuum]	42	42	0.36	0.17	0.28	XP_016544867.1
	Select seq ref|XP_016544868.1|	PREDICTED: putative HVA22-like protein g isoform X2 [Capsicum annuum]	41.6	41.6	0.36	0.18	0.28	XP_016544868.1
	Select seq ref|XP_002364951.1|	hypothetical protein, conserved [Toxoplasma gondii ME49]	41.6	41.6	0.26	0.18	0.4	XP_002364951.1
	Select seq ref|XP_007443455.1|	PREDICTED: receptor expression-enhancing protein 6 [Python bivittatus]	40.8	40.8	0.34	0.22	0.32	XP_007443455.1
	Select seq ref|XP_011286437.1|	PREDICTED: receptor expression-enhancing protein 6 [Felis catus]	41.2	41.2	0.64	0.23	0.23	XP_011286437.1
	Select seq ref|XP_006876812.1|	PREDICTED: uncharacterized protein LOC102830461 [Chrysochloris asiatica]	42	42	0.39	0.23	0.29	XP_006876812.1
	Select seq ref|XP_013195128.1|	PREDICTED: receptor expression-enhancing protein 5 isoform X1 [Amyelois transitella]	41.2	41.2	0.34	0.24	0.3	XP_013195128.1
	Select seq ref|XP_677626.1|	hypothetical protein [Plasmodium berghei strain ANKA] [Plasmodium berghei ANKA]	41.6	41.6	0.37	0.24	0.29	XP_677626.1
	Select seq ref|XP_005083363.1|	PREDICTED: receptor expression-enhancing protein 6 isoform X1 [Mesocricetus auratus]	41.2	41.2	0.32	0.25	0.34	XP_005083363.1
	Select seq ref|XP_009128125.1|	PREDICTED: putative HVA22-like protein g [Brassica rapa]	40	40	0.41	0.26	0.24	XP_009128125.1
	Select seq ref|XP_013002329.1|	PREDICTED: receptor expression-enhancing protein 6 isoform X2 [Cavia porcellus]	41.2	41.2	0.3	0.26	0.34	XP_013002329.1
	Select seq ref|XP_001606968.1|	PREDICTED: receptor expression-enhancing protein 5-like [Nasonia vitripennis]	40.8	40.8	0.34	0.27	0.28	XP_001606968.1
	Select seq ref|XP_008985170.1|	PREDICTED: receptor expression-enhancing protein 6 [Callithrix jacchus]	41.2	41.2	0.24	0.28	0.35	XP_008985170.1
	Select seq ref|XP_003502664.1|	PREDICTED: receptor expression-enhancing protein 6 isoform X1 [Cricetulus griseus]	41.2	41.2	0.3	0.28	0.34	XP_003502664.1
	Select seq ref|XP_007615008.1|	PREDICTED: receptor expression-enhancing protein 6 isoform X2 [Cricetulus griseus]	41.2	41.2	0.32	0.29	0.34	XP_007615008.1
	Select seq ref|XP_009495209.1|	hypothetical protein H696_03046 [Fonticula alba]	40.8	40.8	0.3	0.3	0.32	XP_009495209.1
	Select seq ref|XP_015898855.1|	PREDICTED: HVA22-like protein j [Ziziphus jujuba]	40.8	40.8	0.52	0.3	0.23	XP_015898855.1
	Select seq ref|XP_012803435.1|	PREDICTED: receptor expression-enhancing protein 6 [Jaculus jaculus]	41.6	41.6	0.32	0.3	0.31	XP_012803435.1
	Select seq ref|XP_007042739.1|	HVA22-like protein K isoform 1 [Theobroma cacao]	40.8	40.8	0.4	0.3	0.27	XP_007042739.1
	Select seq ref|XP_013195129.1|	PREDICTED: receptor expression-enhancing protein 5 isoform X2 [Amyelois transitella]	40.8	40.8	0.34	0.32	0.3	XP_013195129.1
	Select seq ref|XP_006302900.1|	hypothetical protein CARUB_v10021029mg [Capsella rubella]	40.4	40.4	0.36	0.33	0.24	XP_006302900.1
