# Supplementary material for: Modeling of axonal endoplasmic reticulum network by spastic paraplegia proteins
Source: eLife. 2017 Jul 25;6:e23882. doi: 10.7554/eLife.23882 (PMC5576921; doi:10.7554/eLife.23882)
Supplement: Supplementary file 5. — For P[acman] tagging primers, upper case represents sequence hybridising to the gene of interest while lower case represents tagging sequence. DOI: http://dx.doi.org/10.7554/eLife.23882.028 [file elife-23882-supp5.xlsx]

## Sheet: Sheet1
Supplementary File 1
Purpose	Primer name	Sequence 5' to 3'	Band size
ReepA mutant generation	CB-0501-3-F	TCGAGGCGATTTCTCCCATTACTC
	CB-0501-3-R	GATCTGGAGAAAGTCCAGTTCG
	ReepA-seq-F	GTCTGCTAGCTGCACCACCT
	ReepA-seq-R	AGTACCAGTGGCAACCAGGA
ReepA mutant testing	ReepA_mutant_Forward	TCGAGGCGATTTCTCCGATTAC TC	ReepA wild type product: 1935 bp
	ReepA_mutant_Reverse	GCTGCACTTCAGATGCCATA	ReepA mutant product: 255 bp
ReepB mutant generation	EY05130-F	GATCTGGAGAAAGTCCAGTTCG	ReepB wild type product: 1679 bp
	EY05130-R	TCTTCTGGTTCAGCGAACACT	ReepB mutant product: 497 bp
	ReepB-seq-F	TGCGACCCTACTTCCTGAAA
	ReepB-seq-R	CCAATACGAGGTGAGGTTGG
ReepB mutant testing	ReepB_mutant_Forward	GATCTGGAGAAAGTCCAGTTC G
	ReepB_mutant_Reverse	CCAATACGAGGTGAGGTTGG
P[acman] tagging	ReepA-EGFP-LAP-F	AGGGTGGAACTGCCACTGGCCAGATGAAAACGCGCAACAACAAGTCGGAGAAGgattatgatattccaactact
	ReepA-EGFP-LAP-R	ATCTAAATCAACATACTGACCAAAGATGGGCAGCCTTAAACCGATGCTCCAtcagaagaactcgtcaagaagg
	ReepB-EGFP-LAP-F	GGATCATCGATGATGGCATGAAGAAAGCCGCTGGAGTGCTGAAGCATGACgattatgatattccaactact
	ReepB-EGFP-LAP-R	CAAATGCATGCATGGATAAGCGAGAAGCGGTCGGAGCTACGGTACATTCGCCTTtcagaagaactcgtcaagaagg
	EGFP-F	GGGGTACCCACCATGGTGAGCAAGGGCGAGG
	EGFP-R	CAGGGTGGTCACGAGGTTGG
ReepA::GFP testing	ReepA1::GFP_seq_L	GCAGCTCCAGCAATGTGAT	ReepA1::GFP product: 369 bp
	ReepA1::GFP_seq_R	GCTTGATCGTCTGCACCAG
	ReepA2::GFP_seq_L	CCATCAGCCAGACATCGAC	ReepA2::GFP product: 302 bp
	ReepA2::GFP_seq_R	GGGGGTTAGTAACGCAACTG
	ReepA3::GFP_seq_L	GTCTGCTAGCTGCACCACCT	ReepA3::GFP product: 341 bp
	ReepA3::GFP_seq_R	AGTACCAGTGGCAACCAGGA
ReepB::GFP testing	ReepB-EGFP_F	GATCTGGAGAAAGTCCAGTTCG	ReepB::GFP product: 2474 bp
	ReepB-EGFP_R	TCGGGGTAGCGGCTGAAGCACT
Rtnl1 mutant testing	Rtnl1_mutant_Forward	GGAAATTGCGTGGAACTCAT	Rtnl1 wild type product: 5623 bp
	Rtnl1_mutant_Reverse	TATTCGCATTTCCTCGATCC	Rtnl1 mutant product: 496 bp
Rtnl1[Pacman] testing	Rtnl1_pacman_Forward	TCATCGGCATAGTATATCGGCA
	Rtnl1_pacman_Reverse	CAGATGACCAGGATCCGGAG
